# Supplementary figures and images for: One-pot approach for the synthesis of trans-cyclopropyl compounds from aldehydes. Application to the synthesis of GPR40 receptor agonists
Source: Royal Society of Chemistry journal article supplement (doi:10.1039/b810708d), 2008-01-01

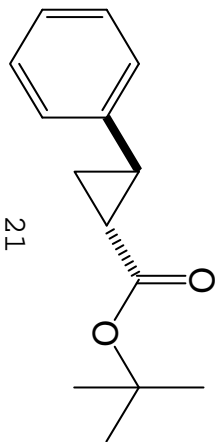

21

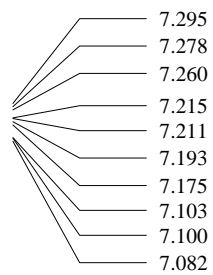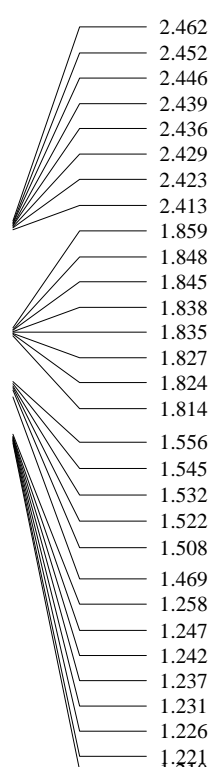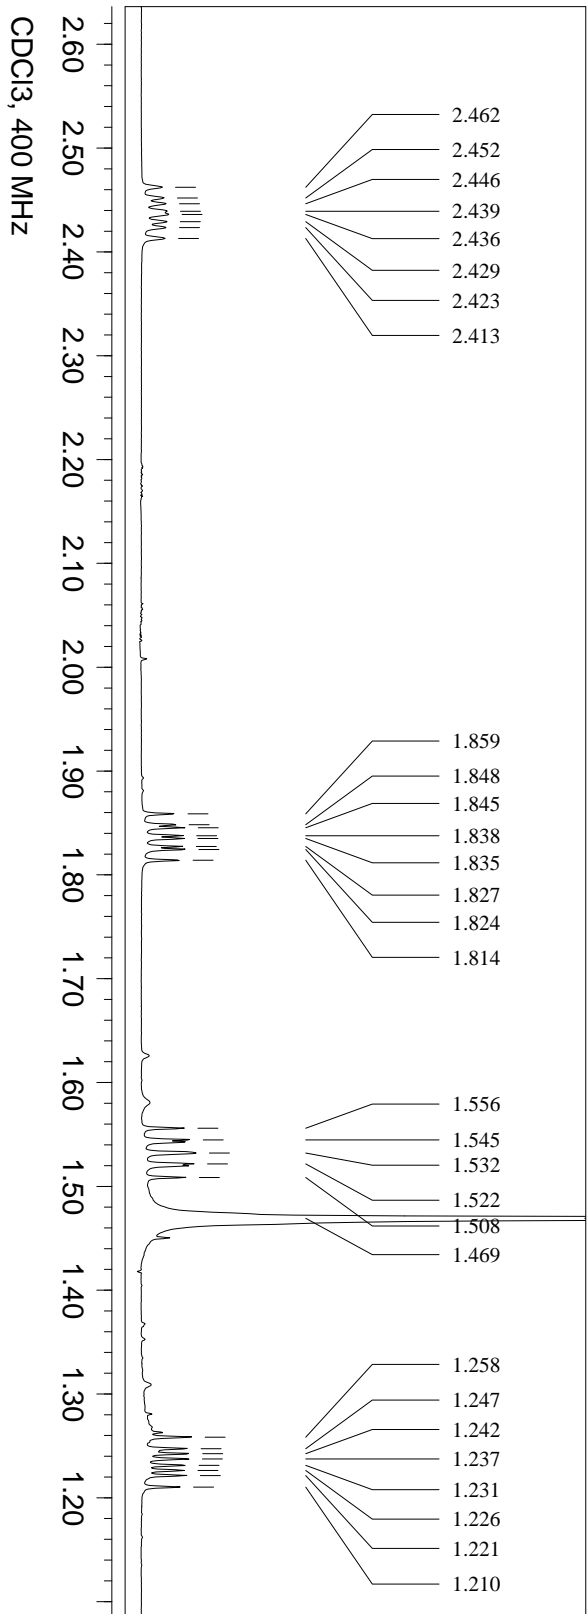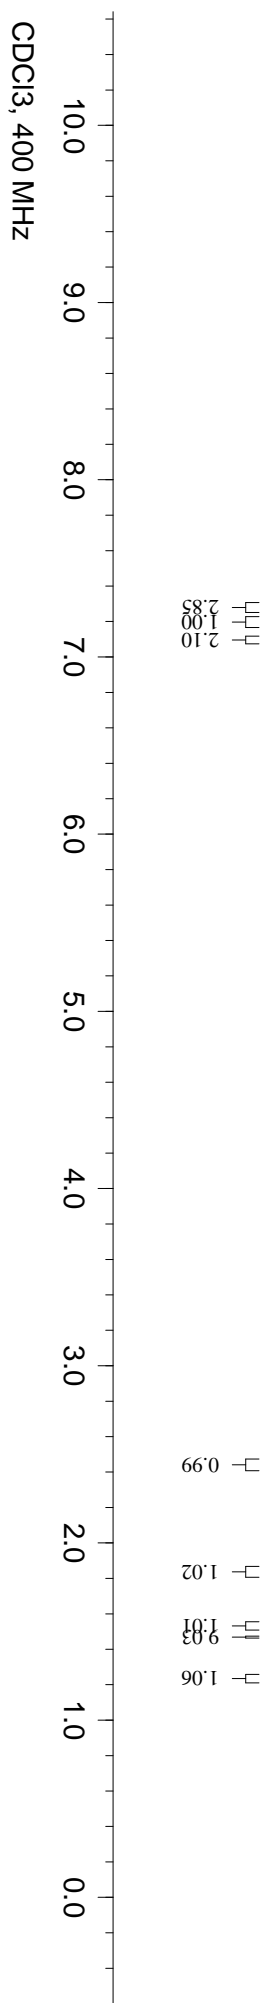

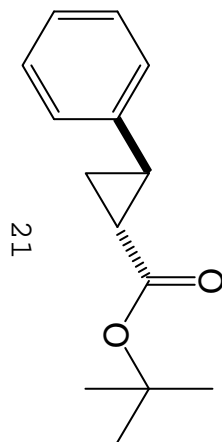

172.546

140.504

128.397

126.294

126.052

80.541

77.318

77.000

76.683

28.160

25.728

25.283

17.043

CDCI3, 100 MHz

210 200 190 180 170 160 150 140 130 120 110 100 90 80 70 60 50 40 30 20 10 0

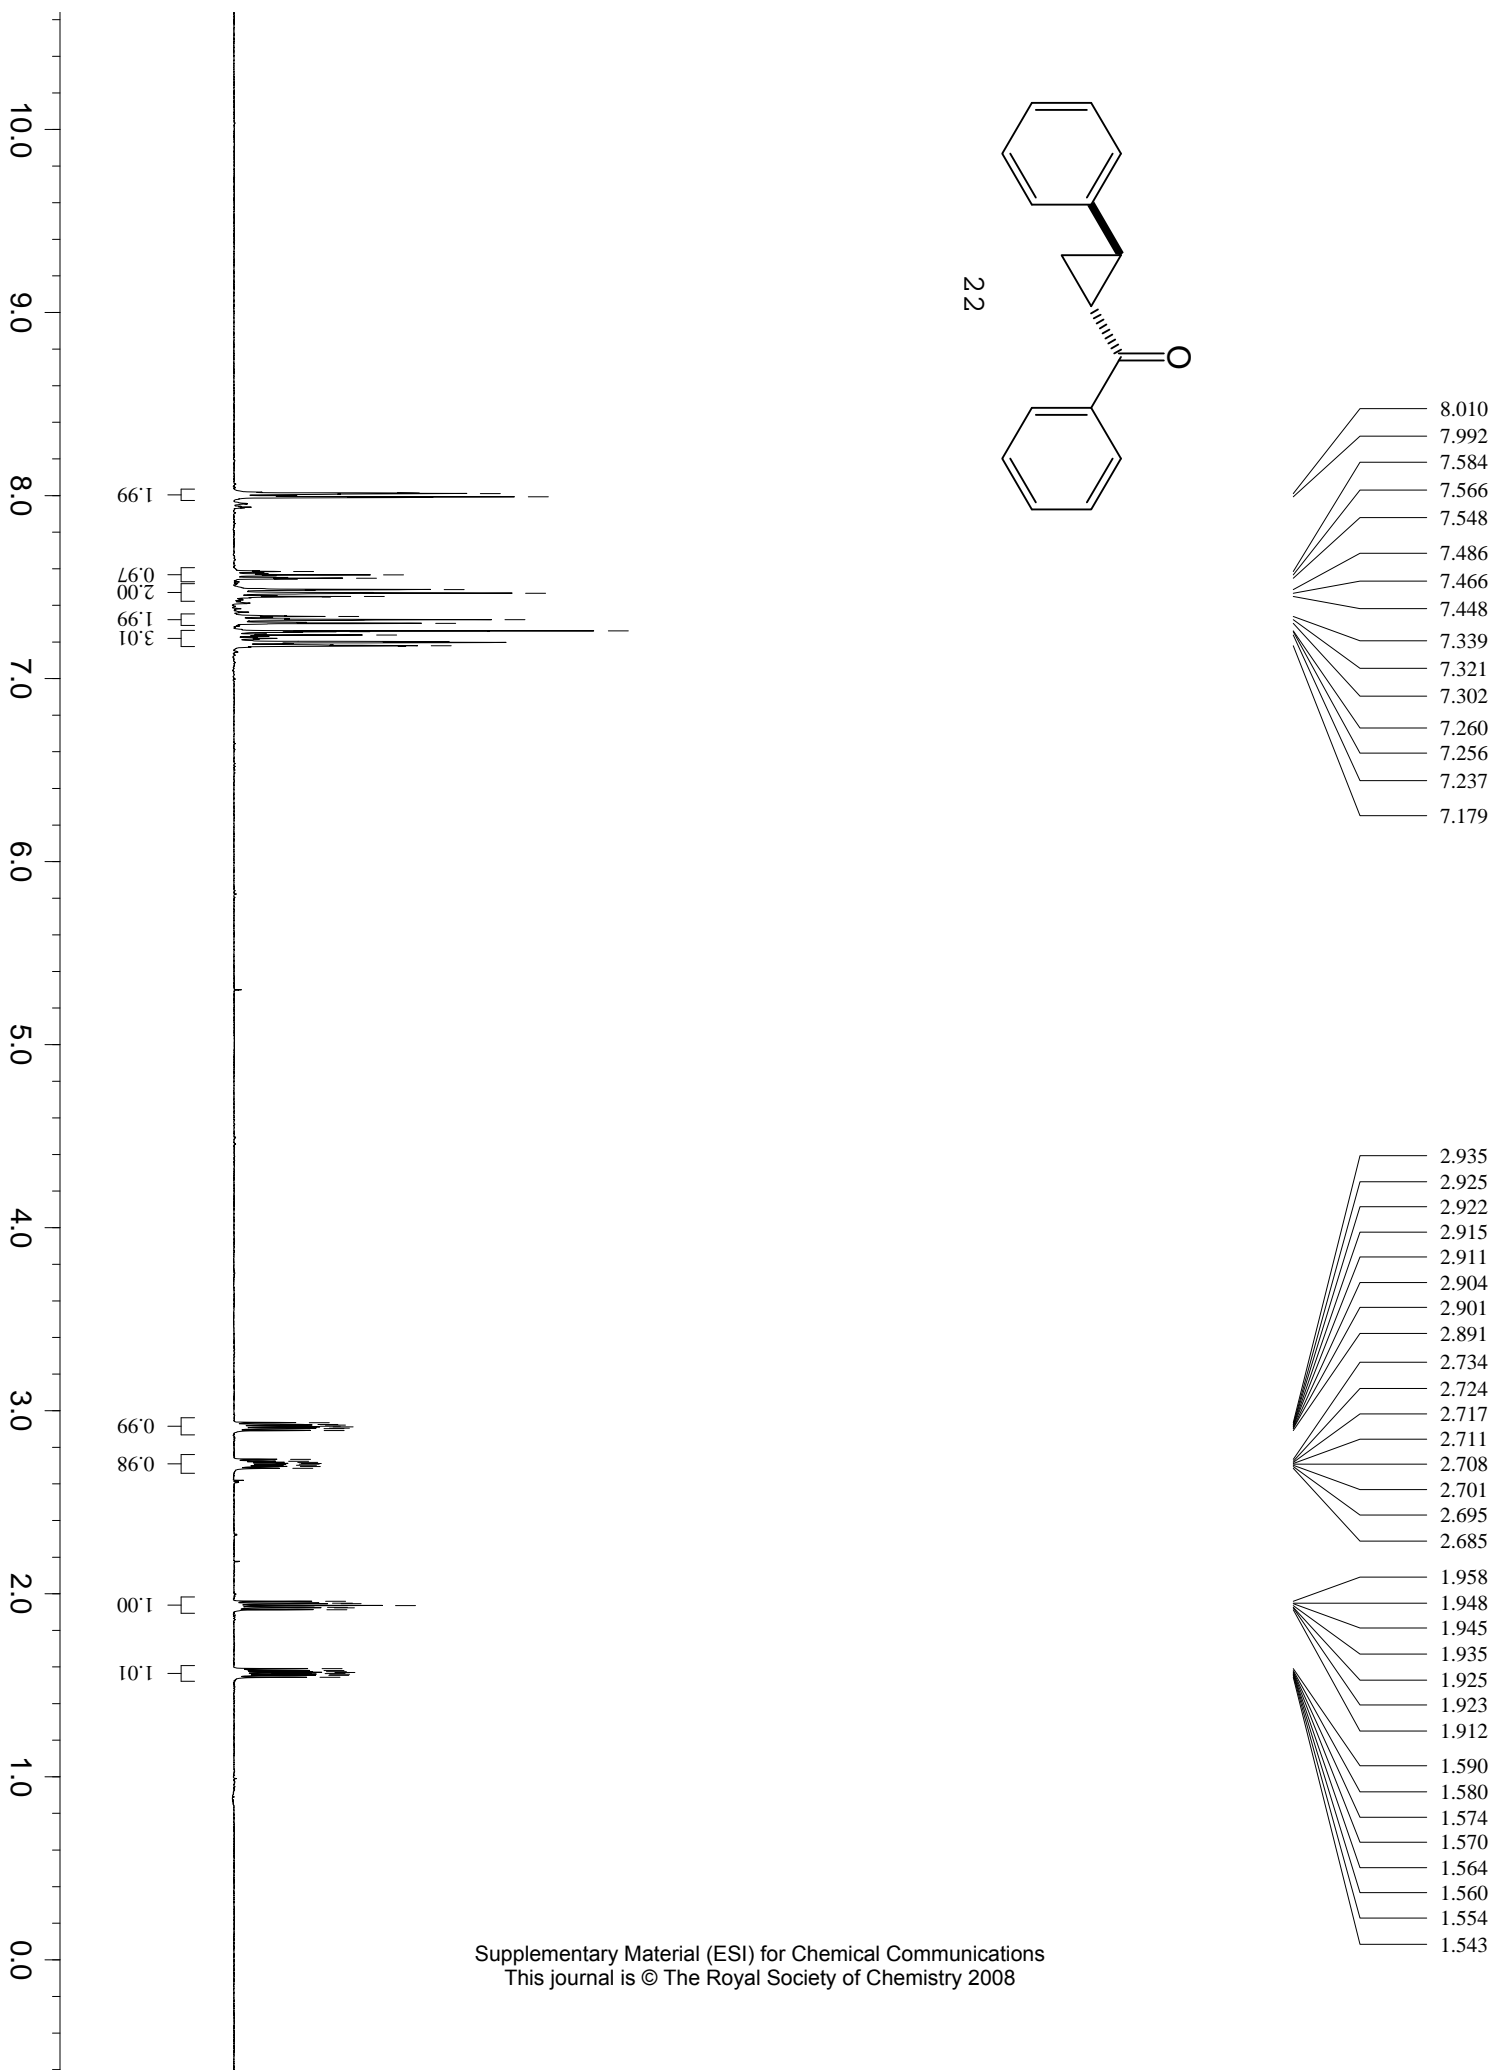

210  
200  
190  
180  
170  
160  
150  
140  
130  
120  
110  
100  
90  
80  
70  
60  
50  
40  
30  
20  
10  
0

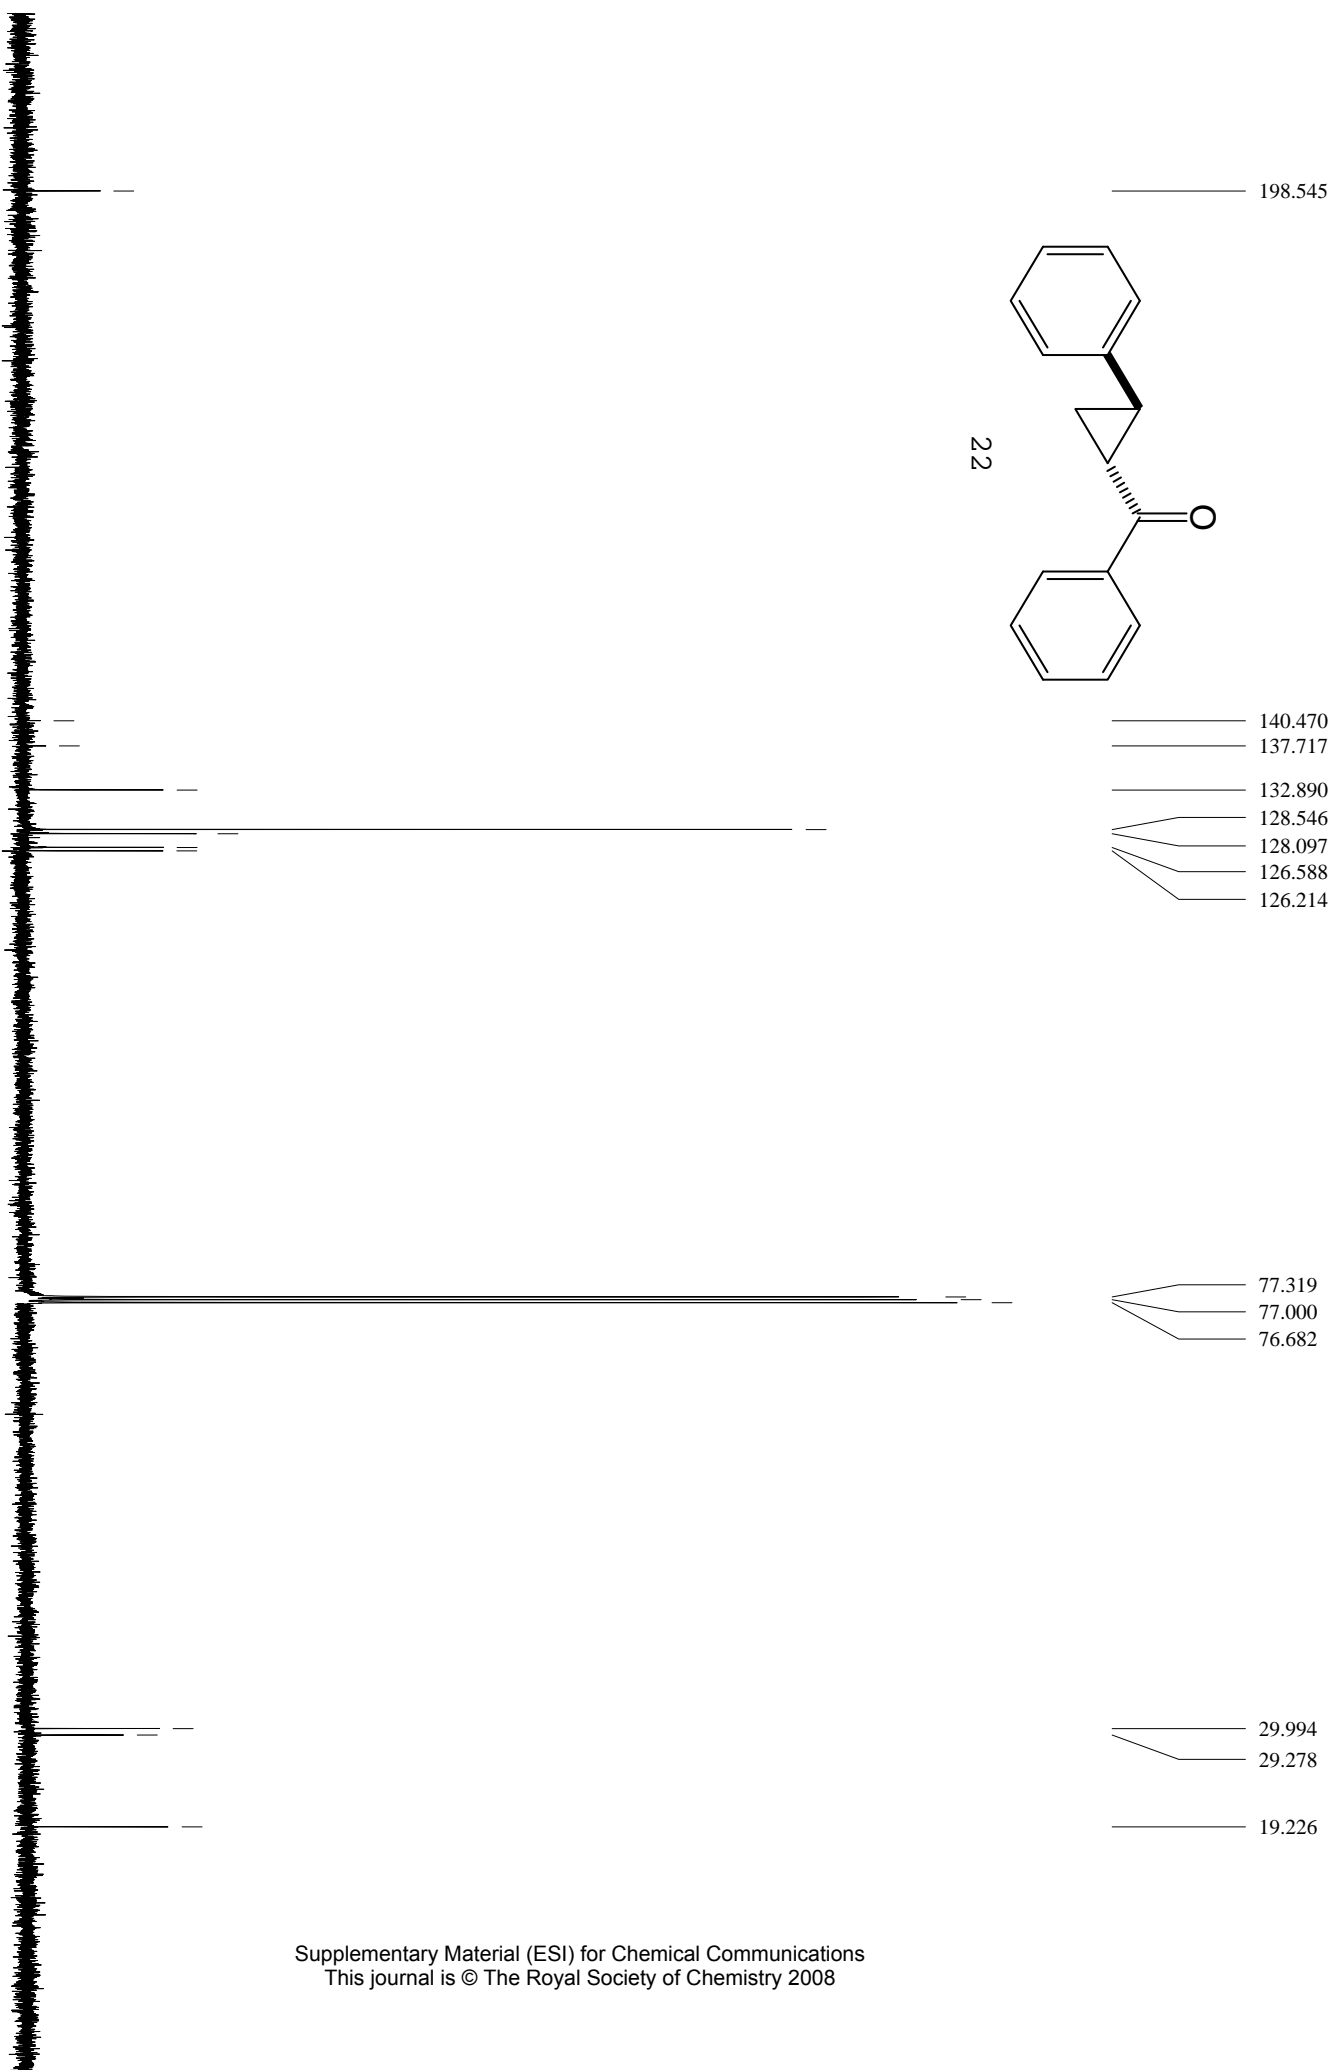

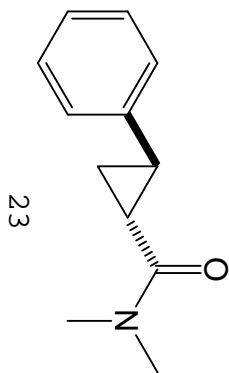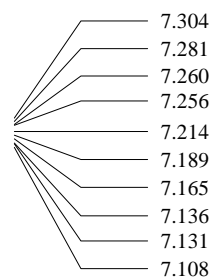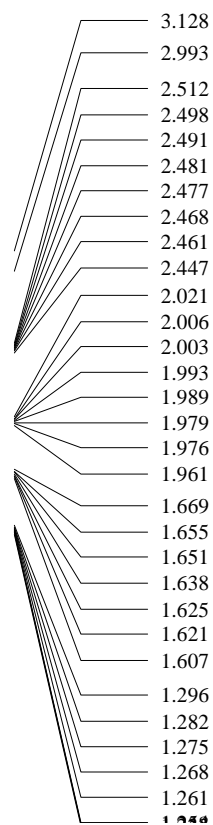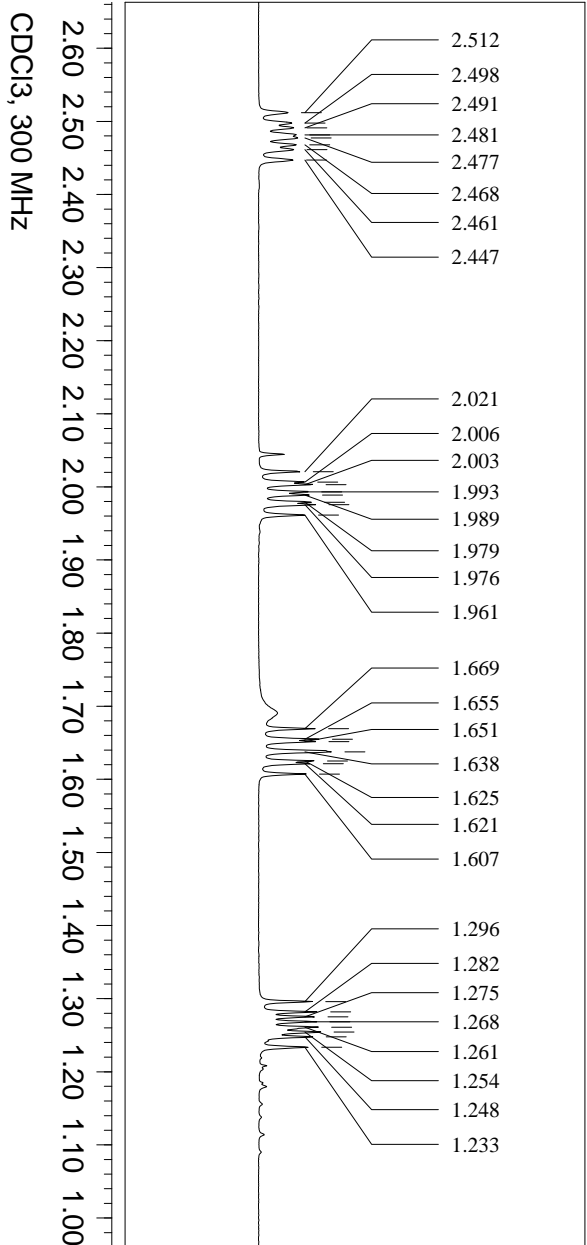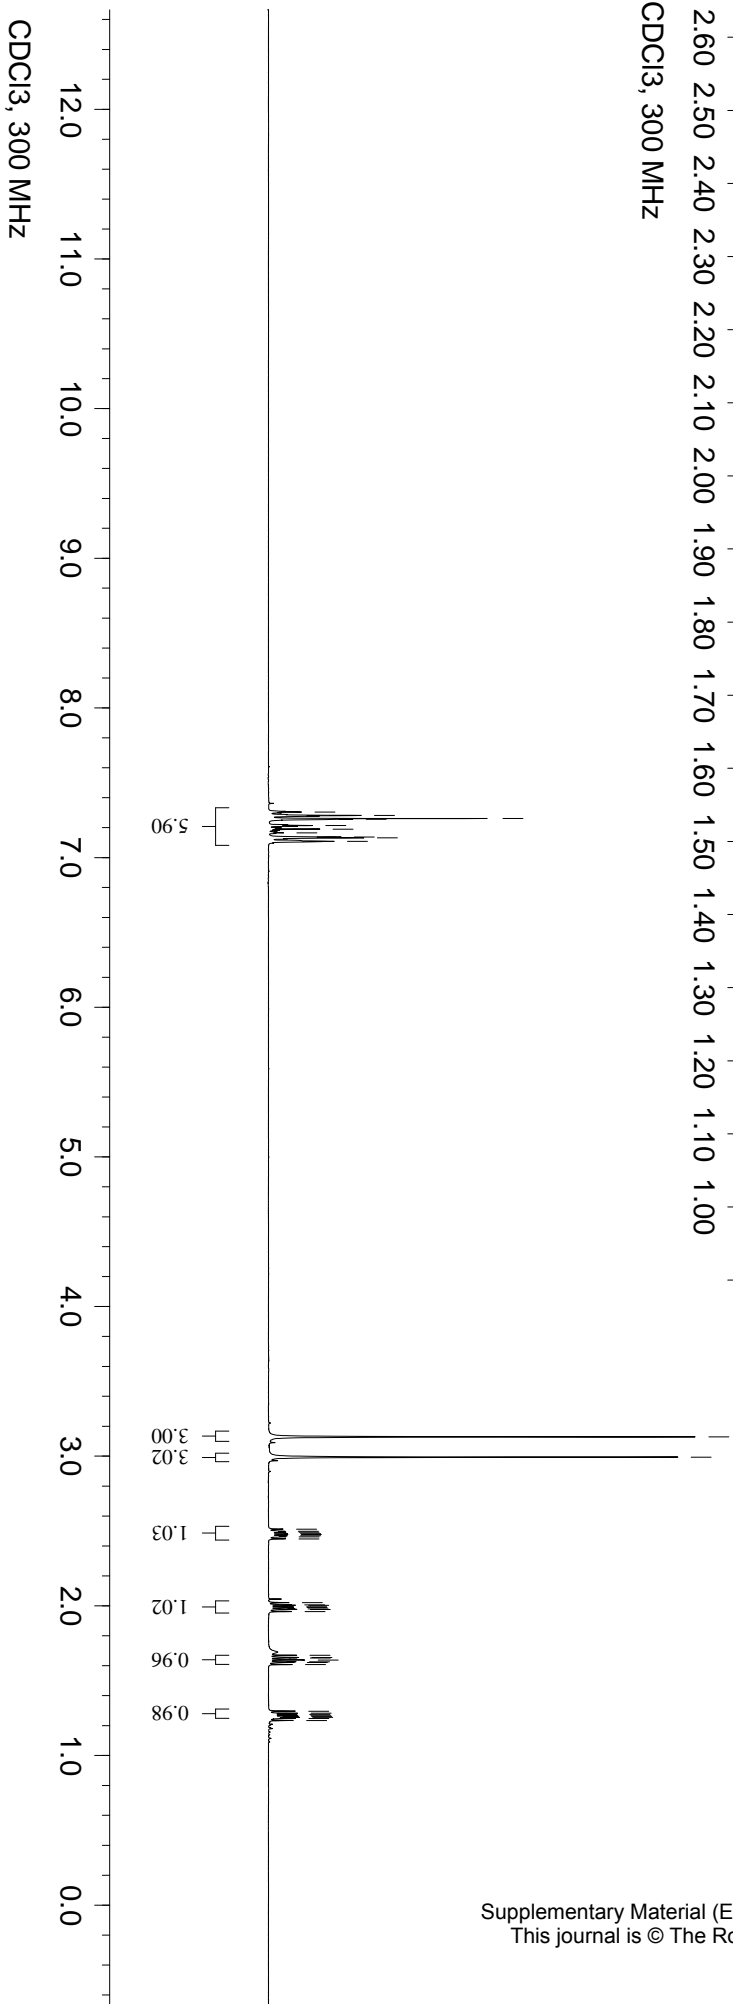

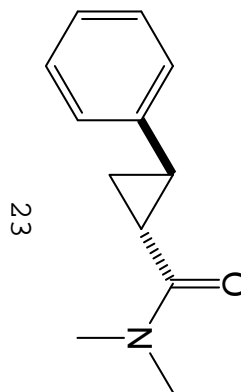

171.886

141.096

128.409

126.160

126.061

77.424

77.000

76.576

37.285

35.857

25.472

23.157

16.255

CDCI3, 75 MHz

210 200 190 180 170 160 150 140 130 120 110 100 90 80 70 60 50 40 30 20 10 0

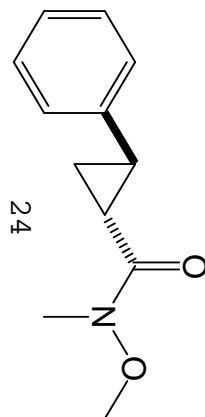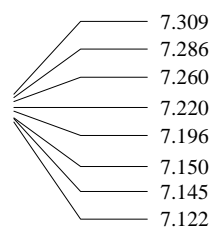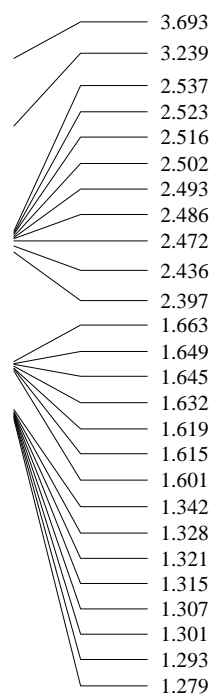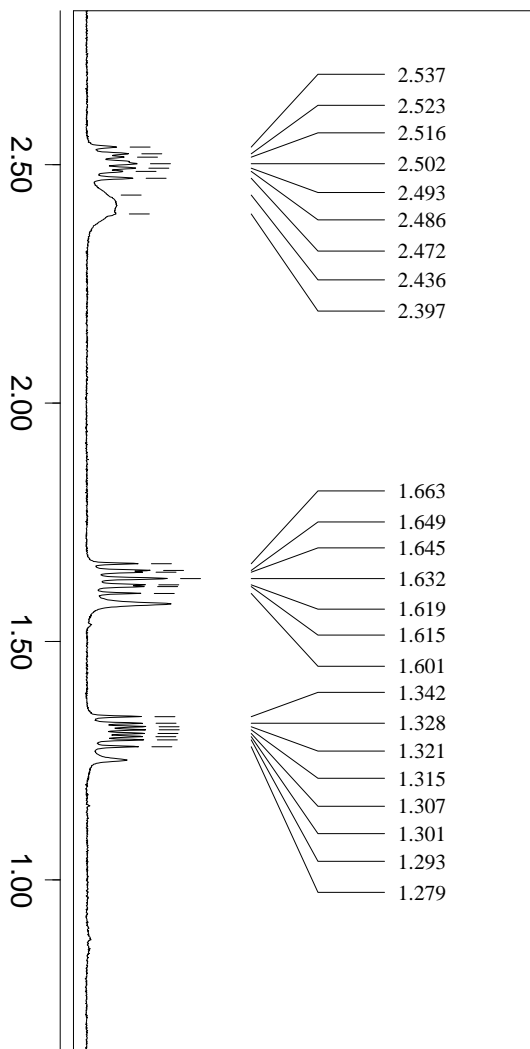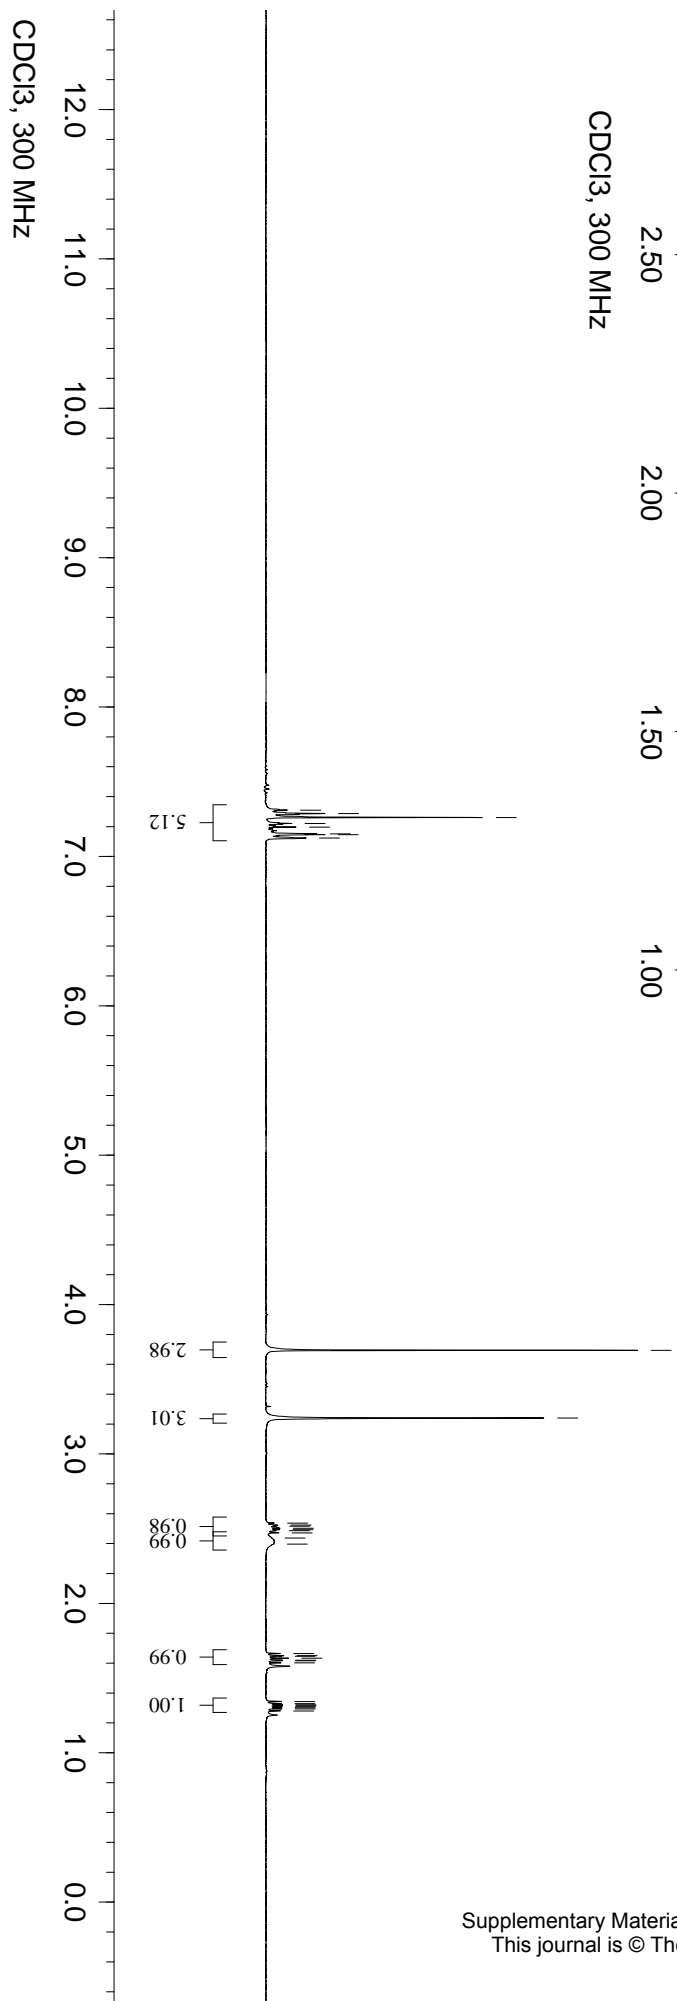

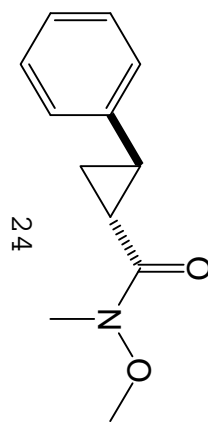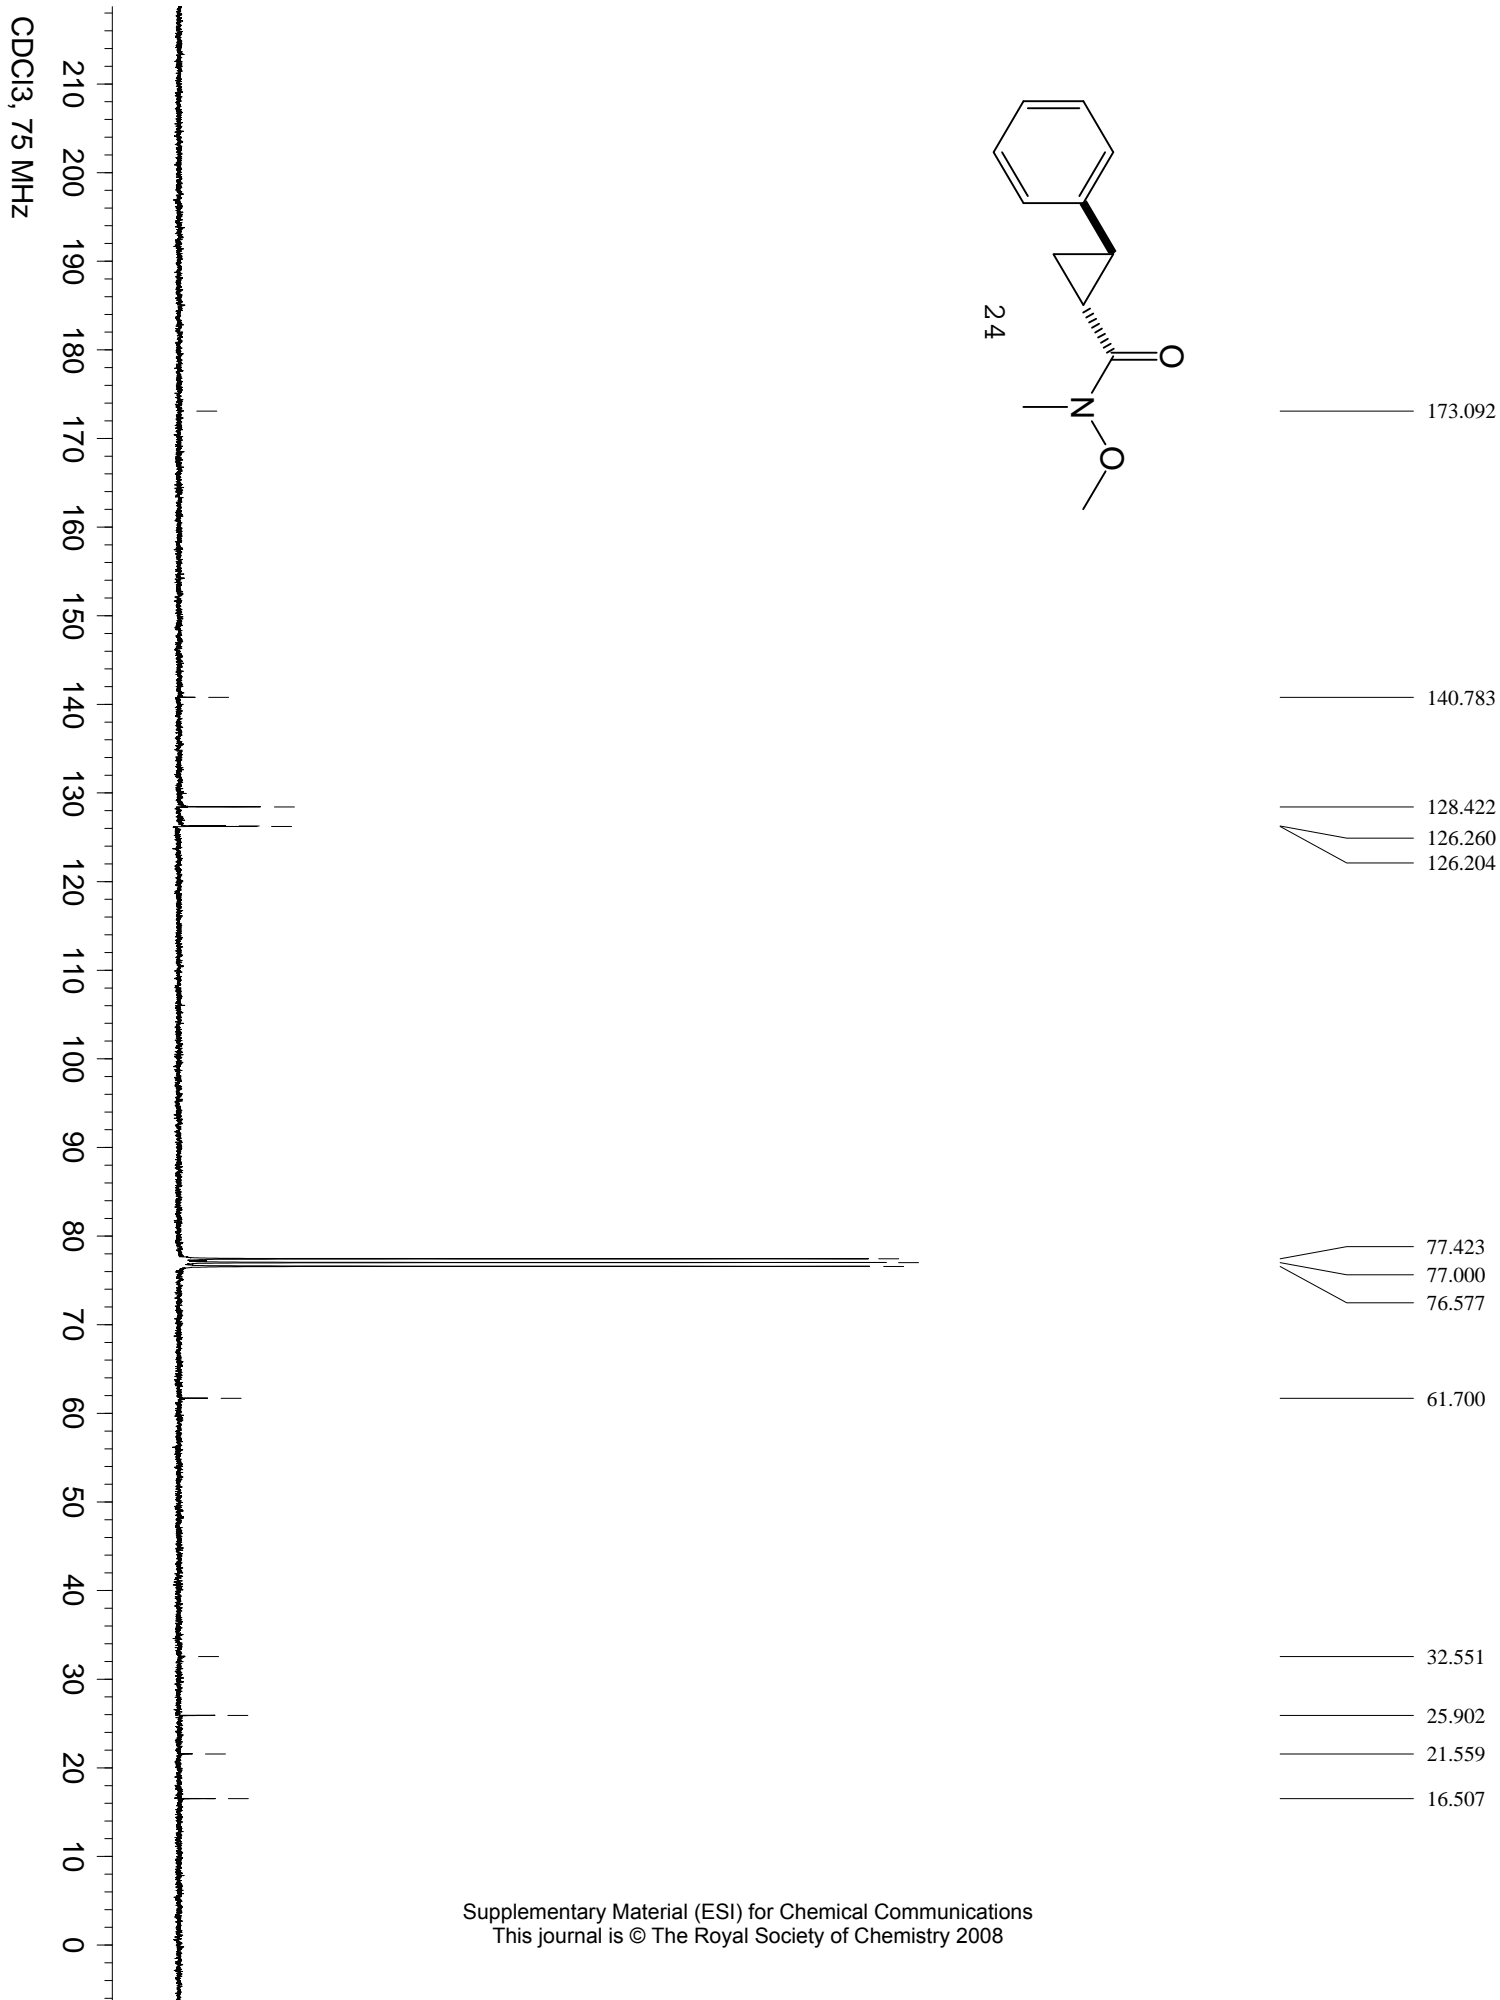



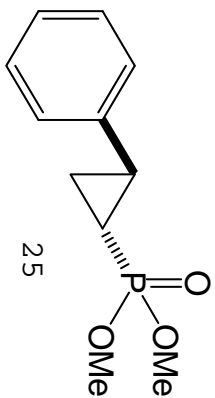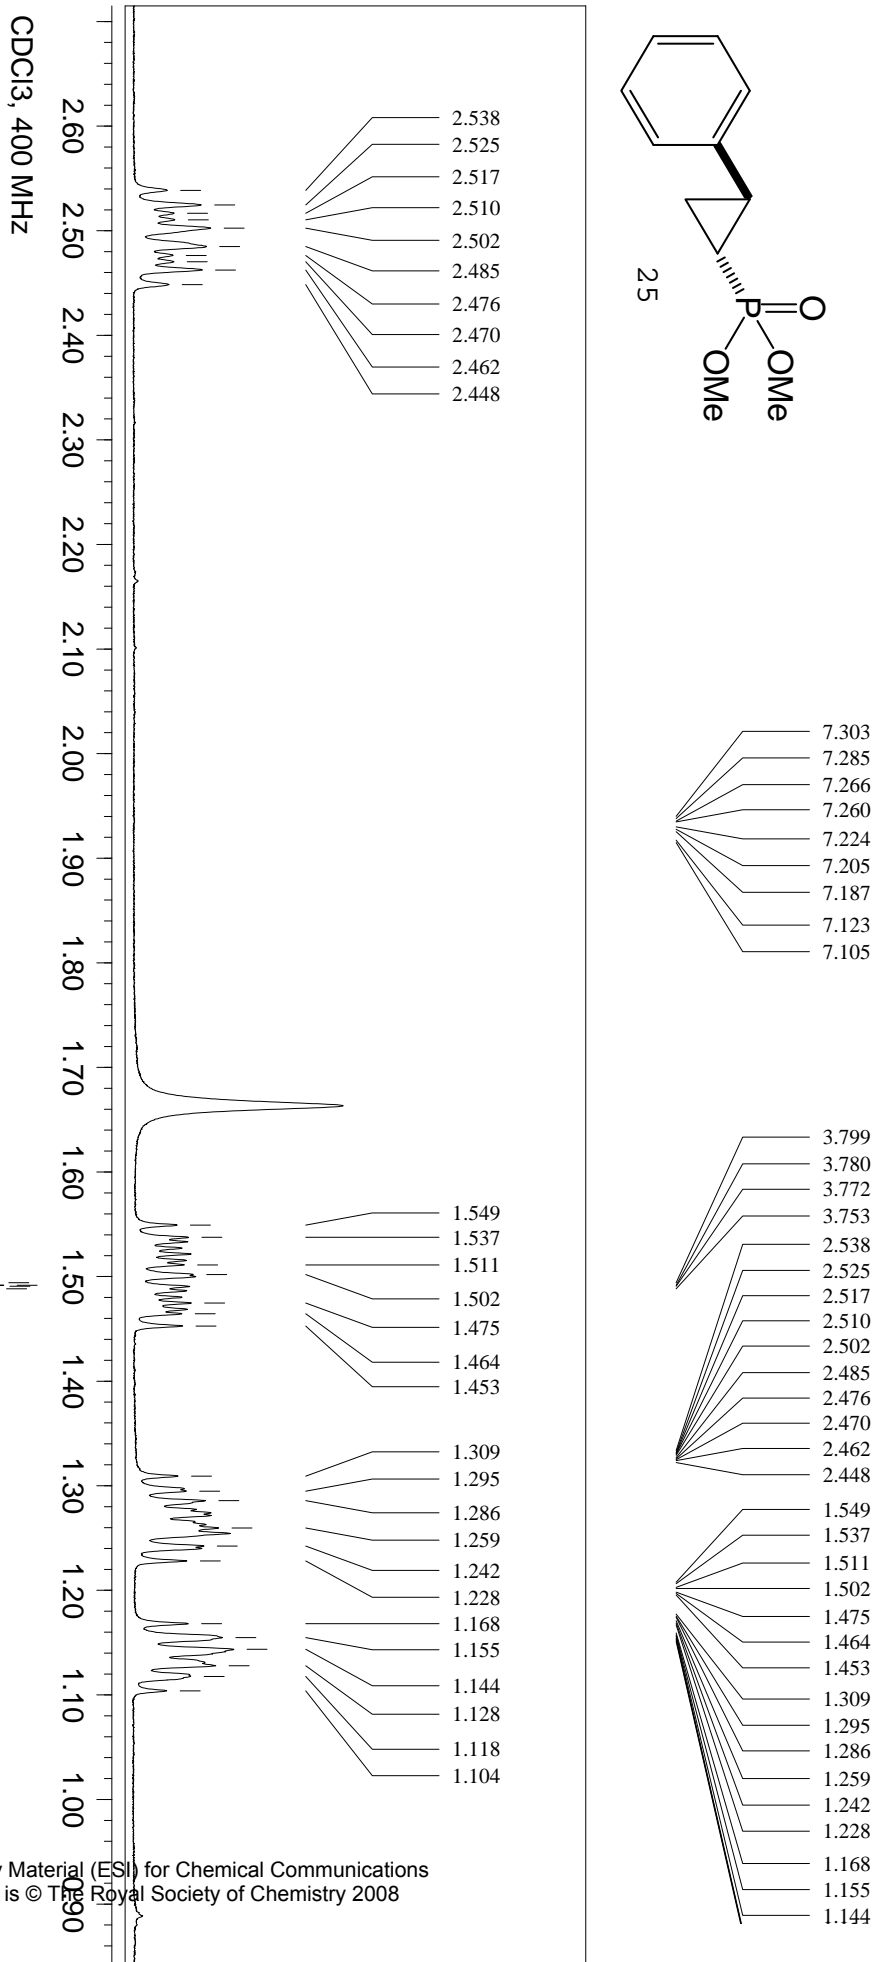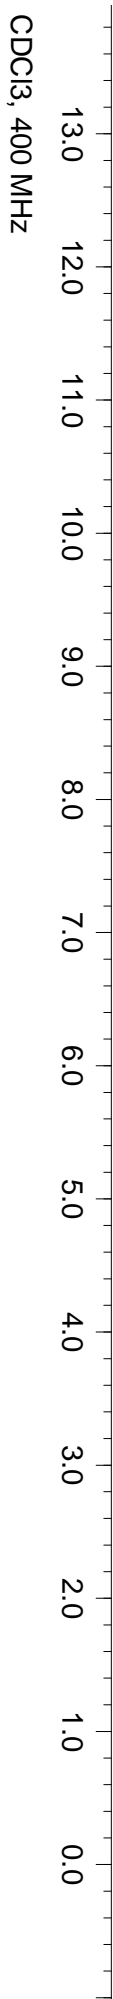

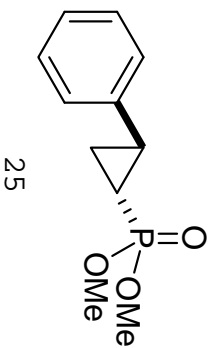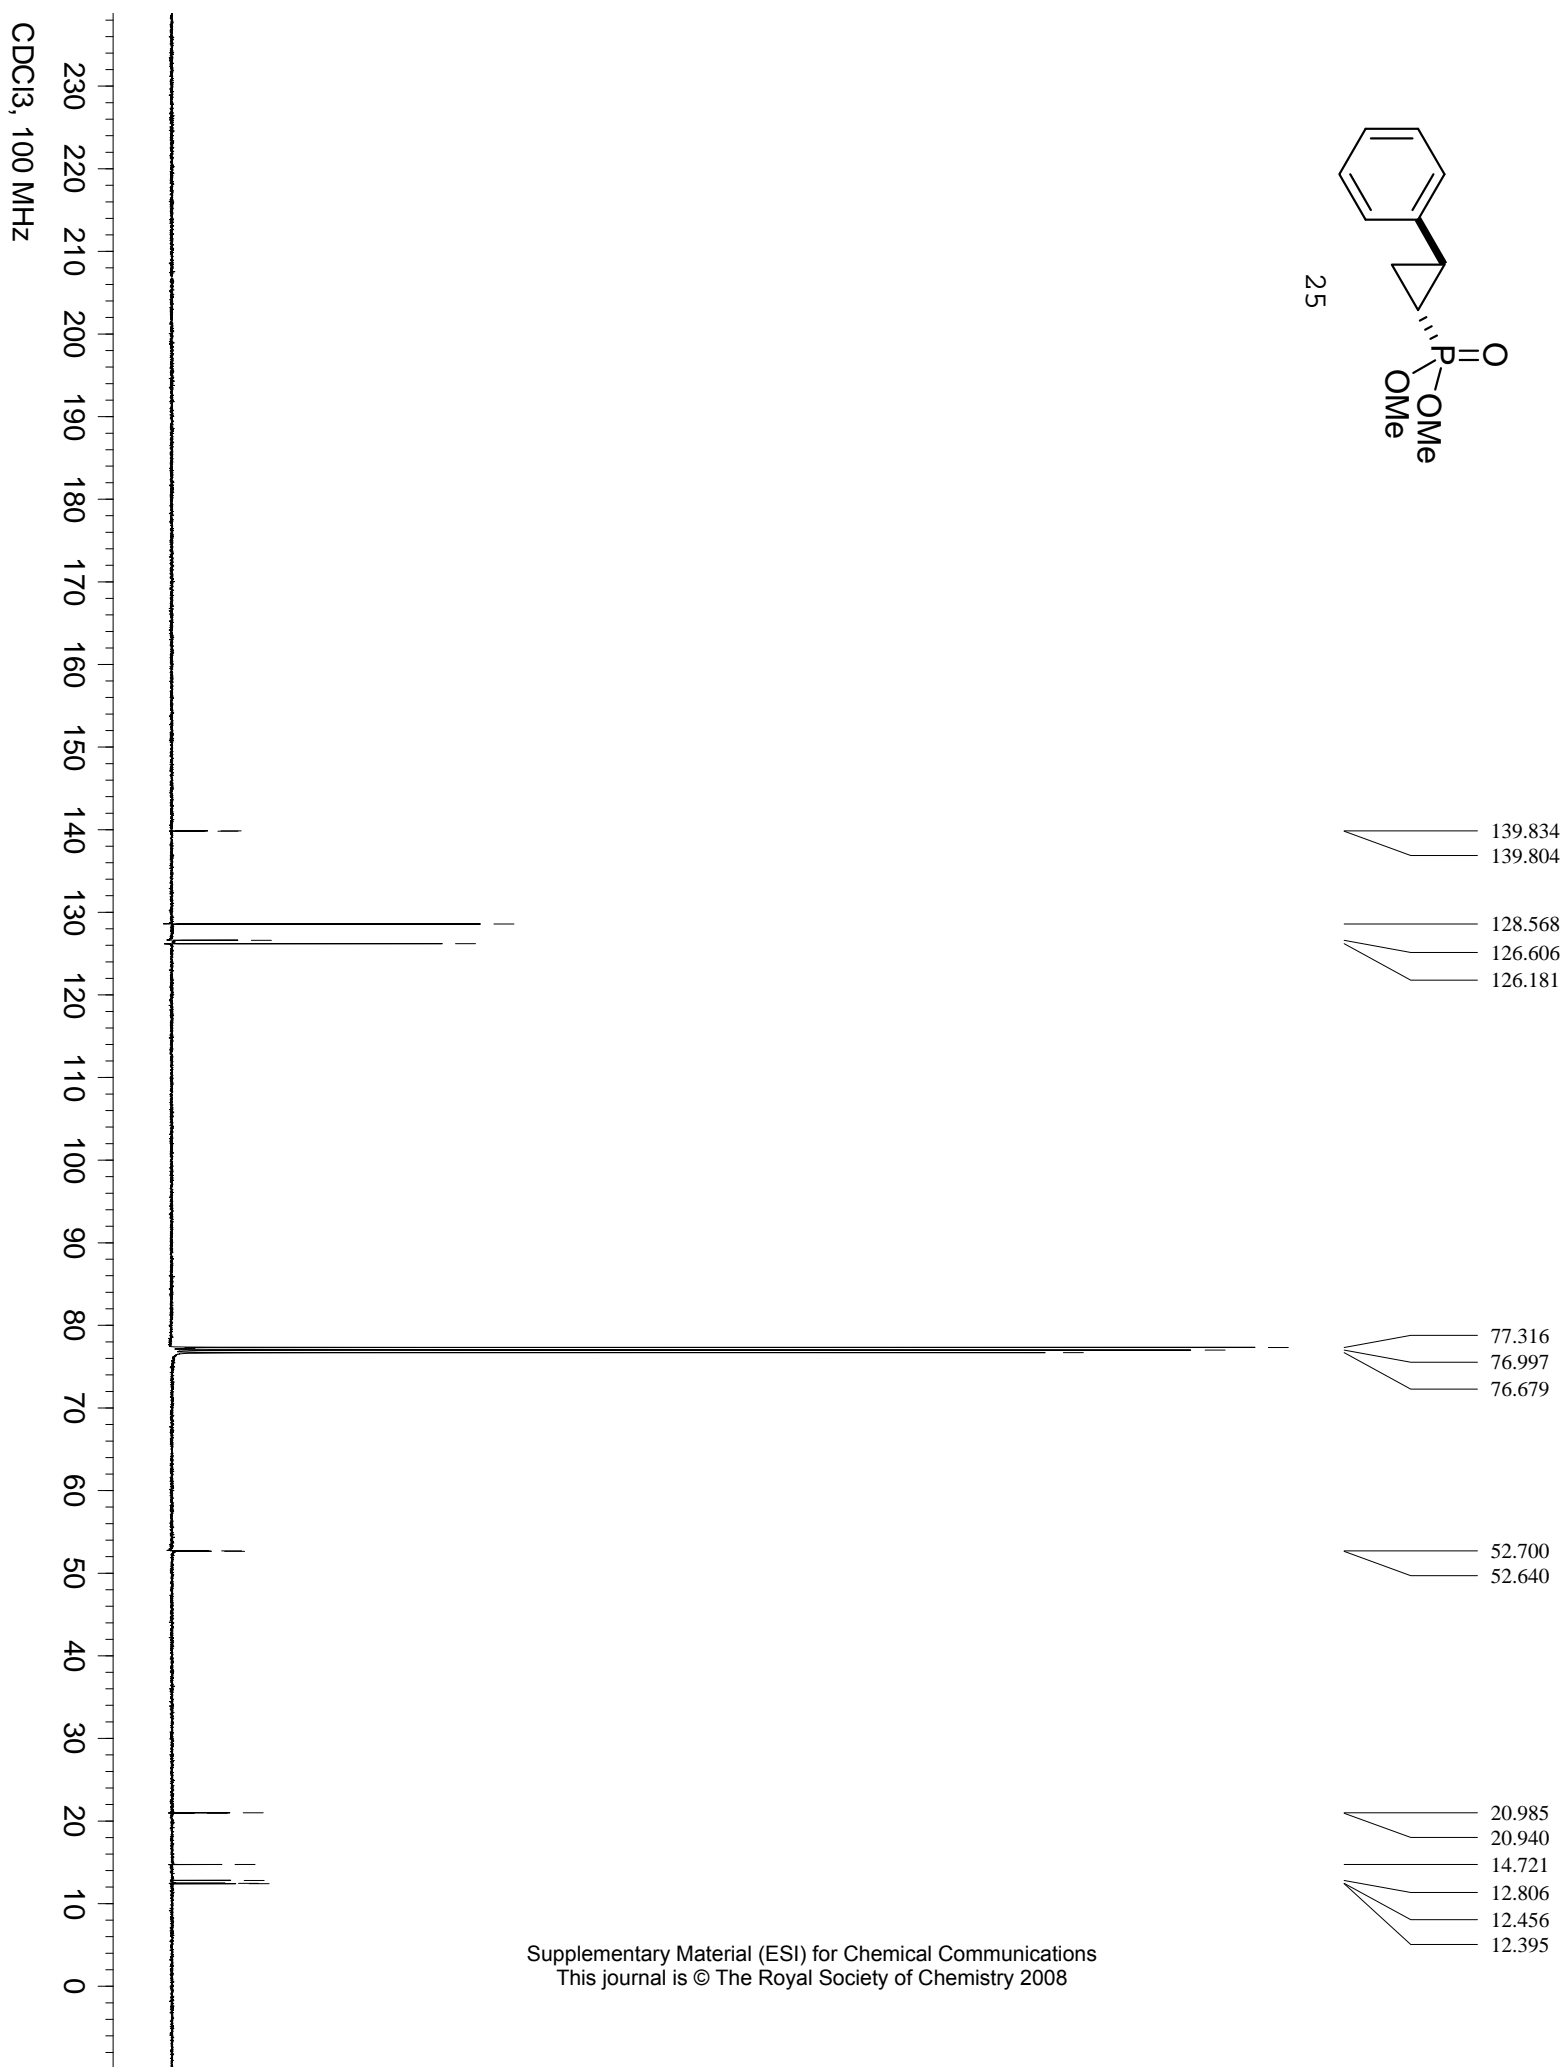

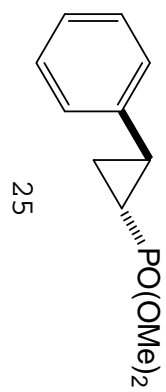

23.188

CDCI3, 121 MHz

140 130 120 110 100 90 80 70 60 50 40 30 20 10 0 -10 -20 -30 -40 -50 -60 -70 -80 -90 -100 -110 -120 -130 -140

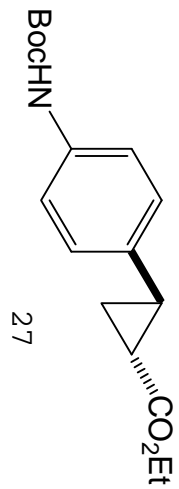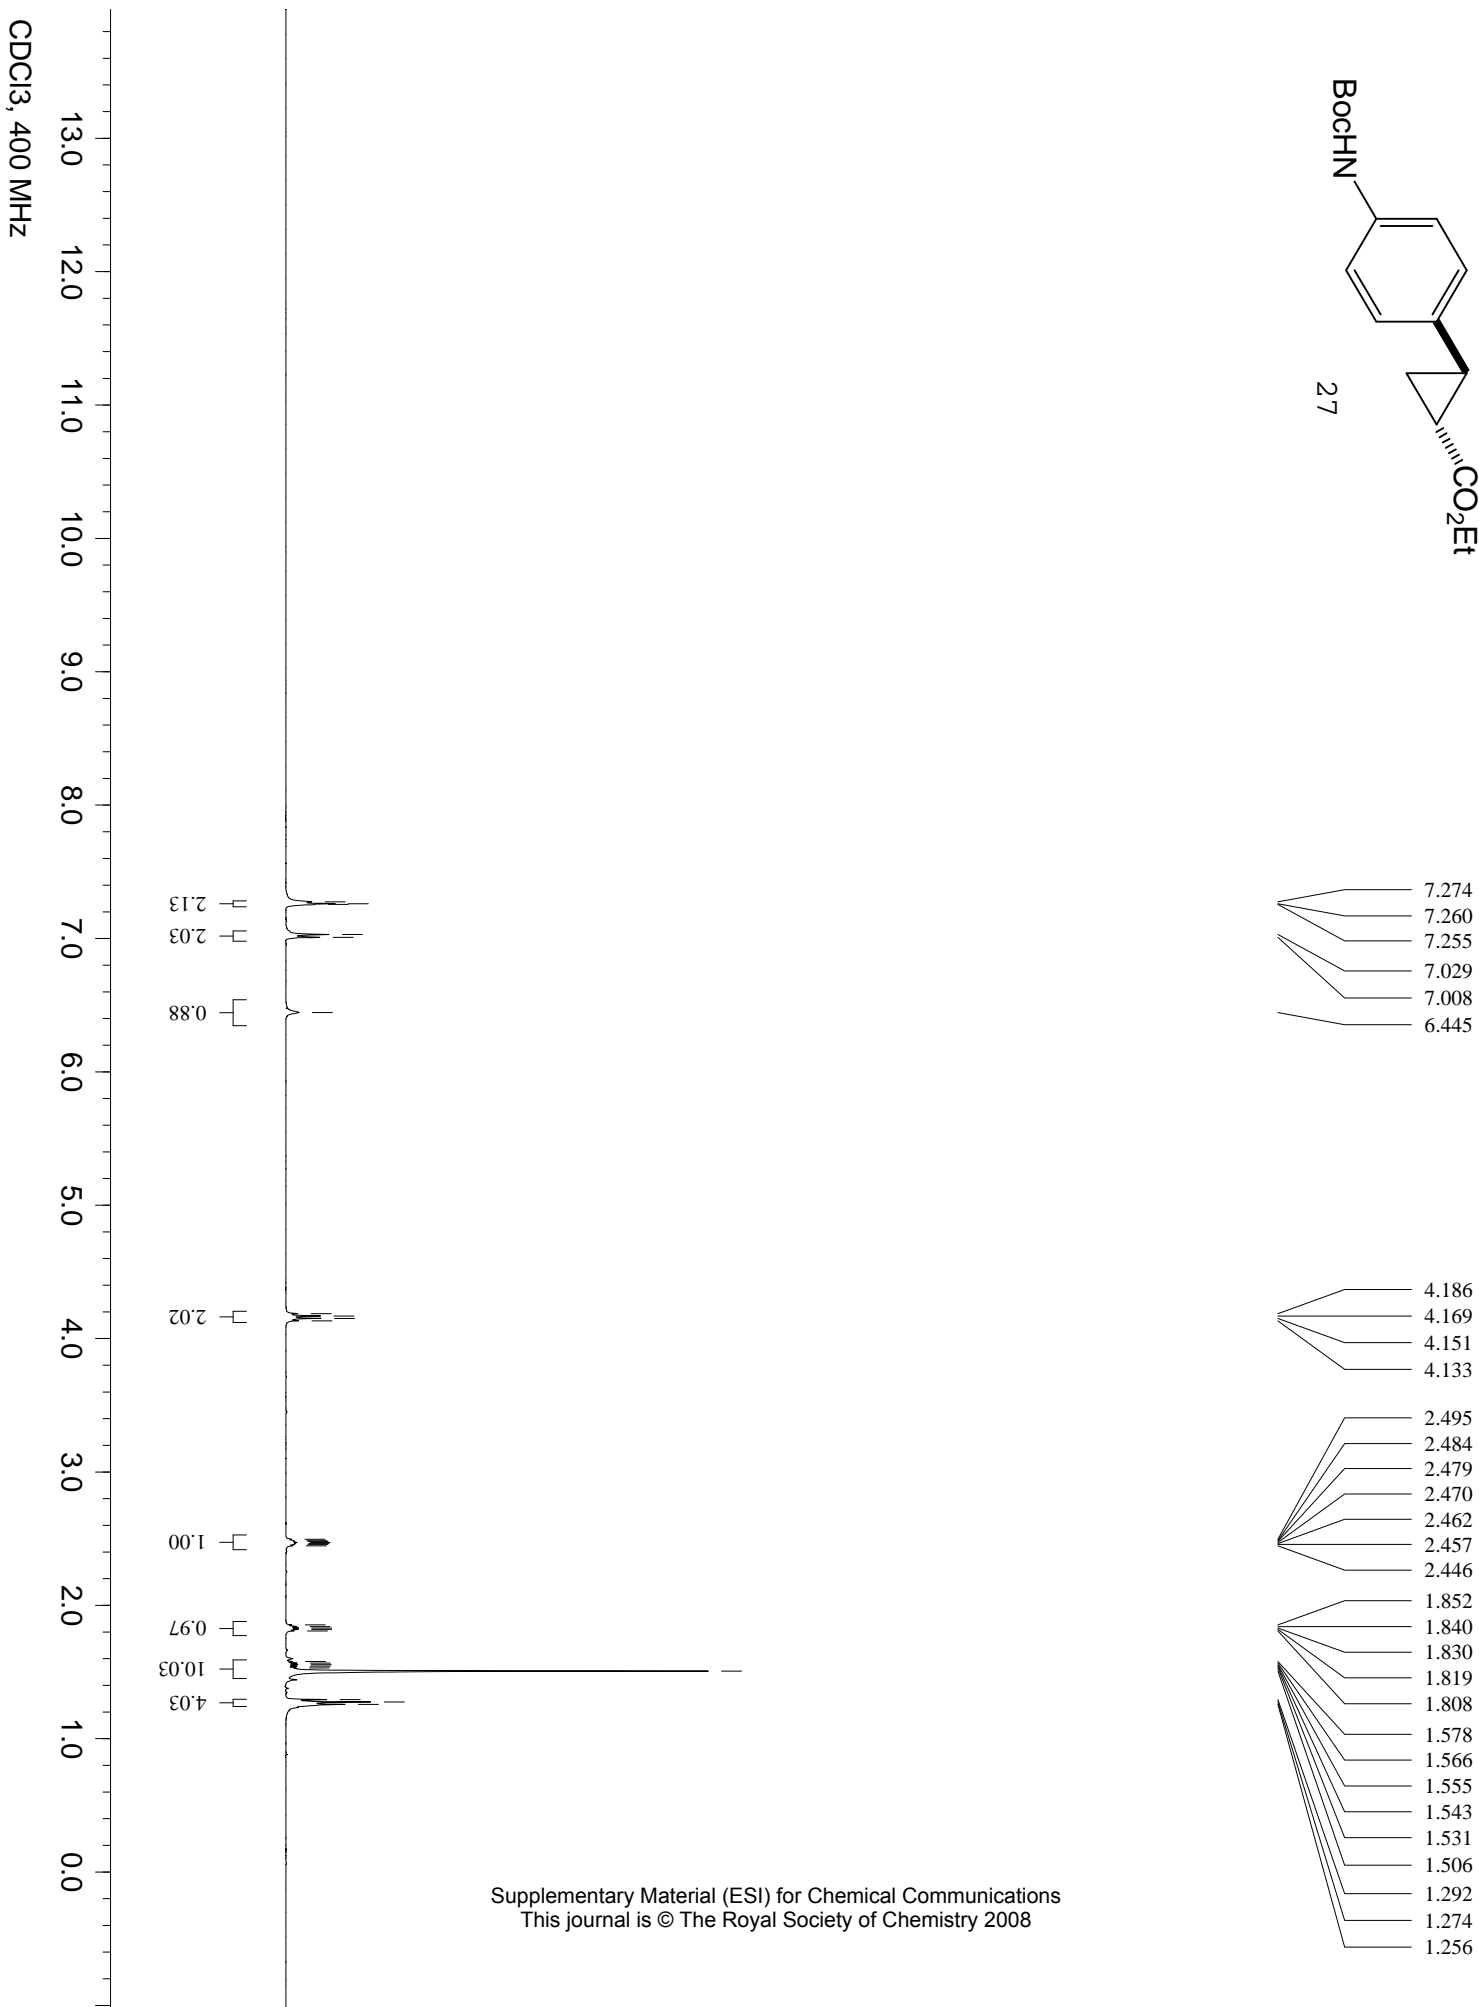

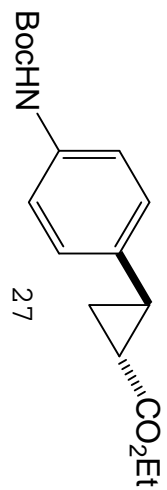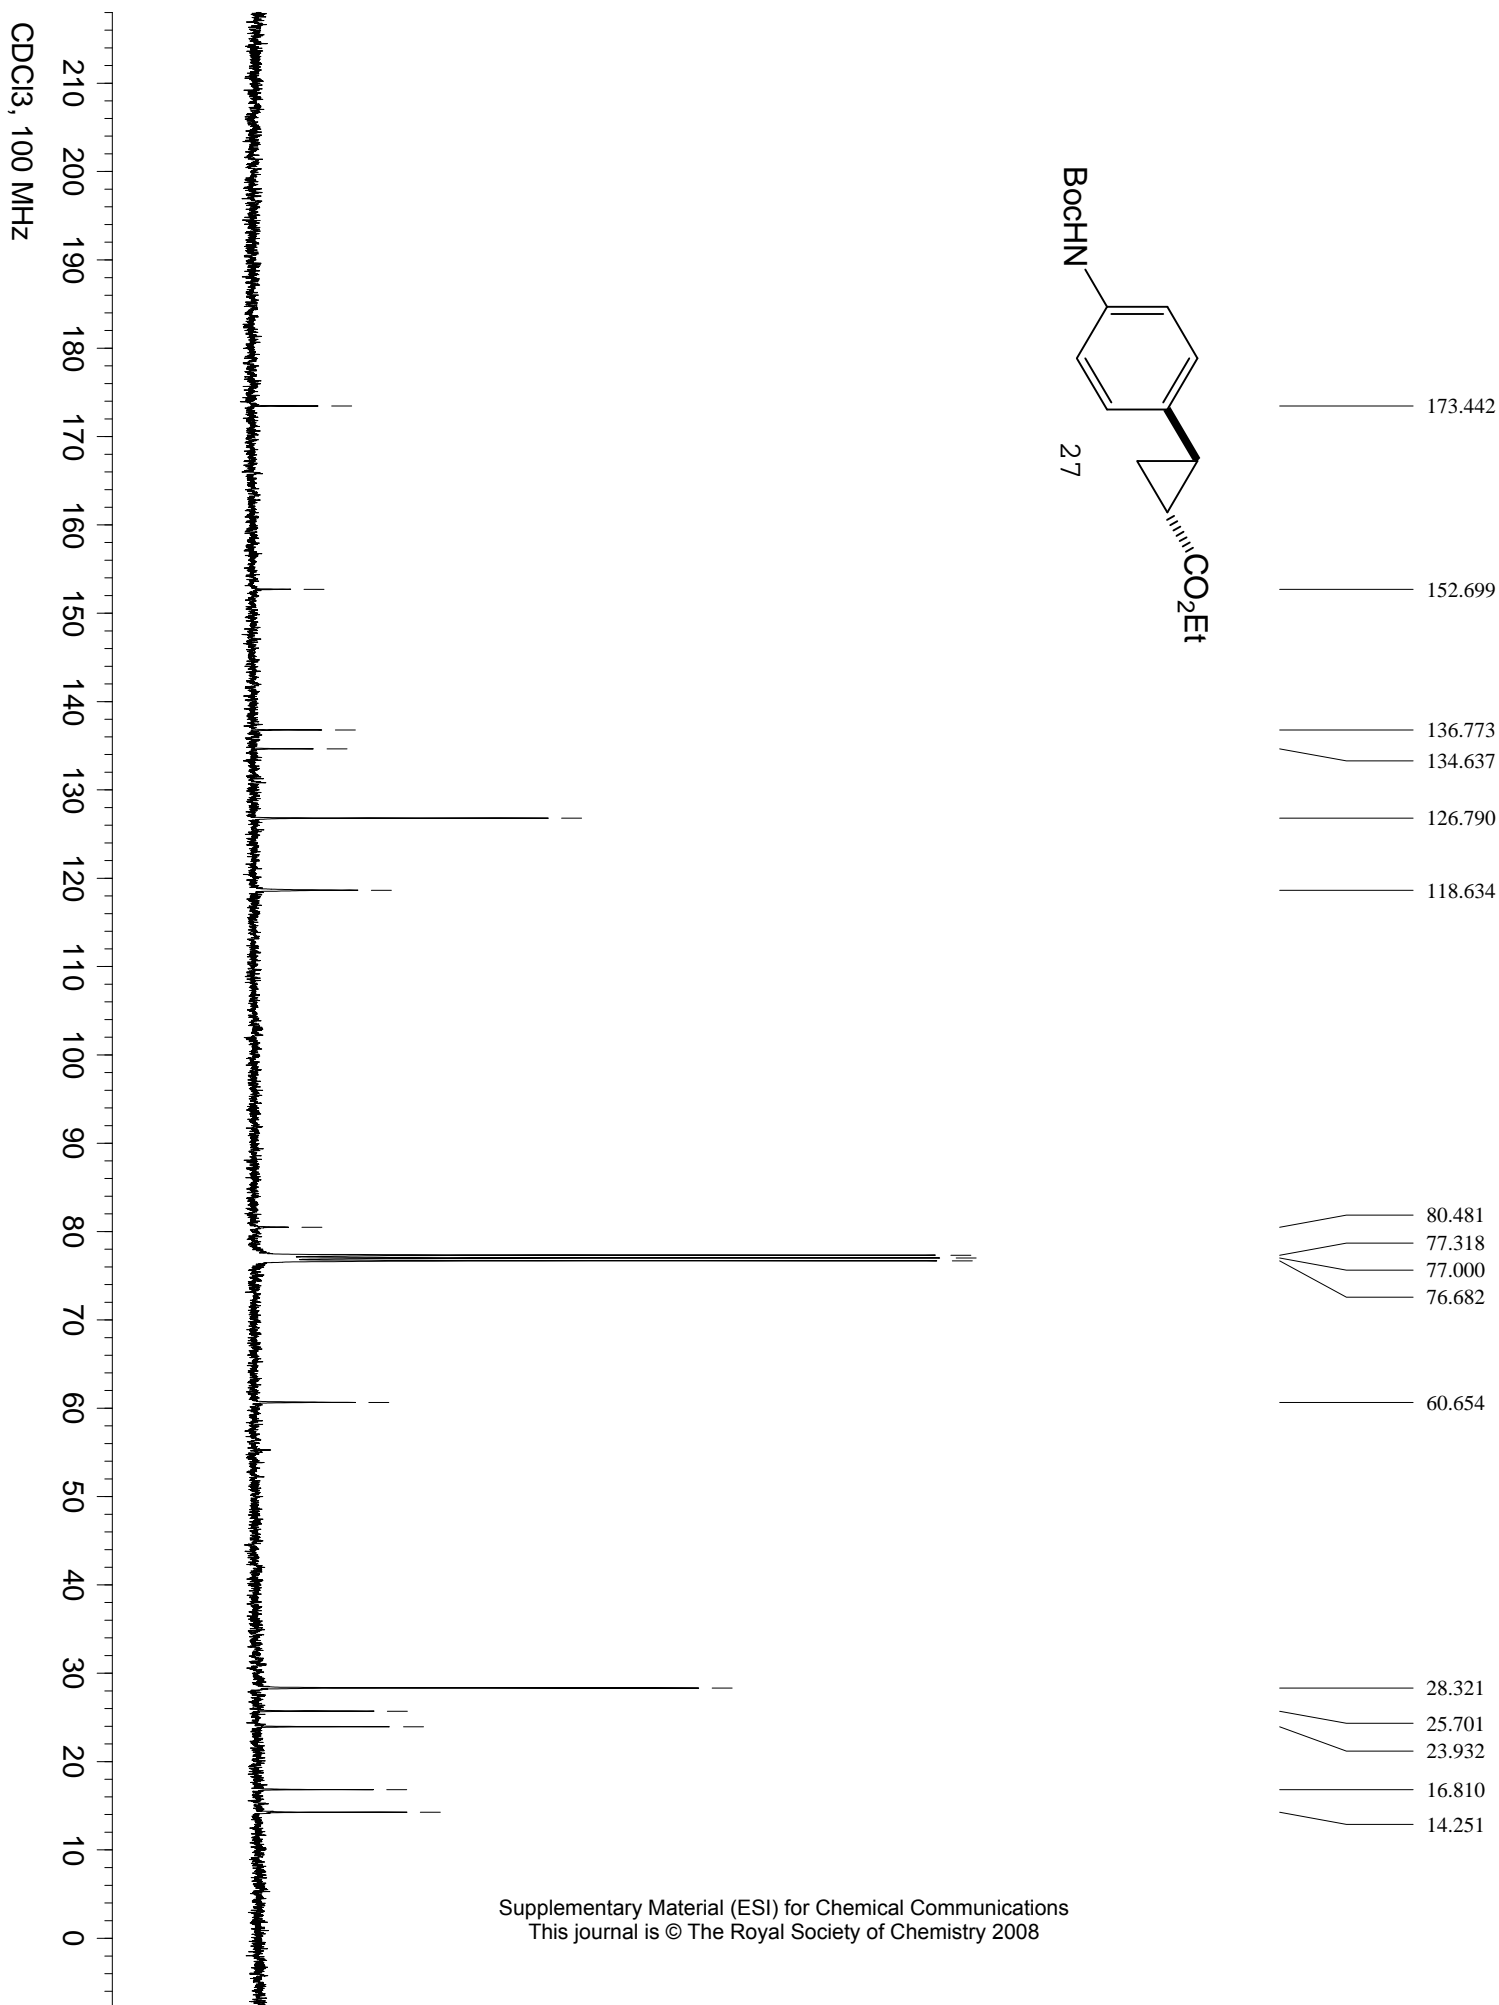

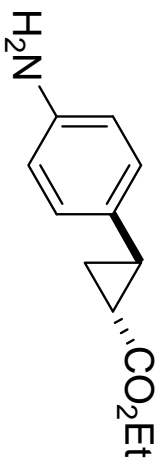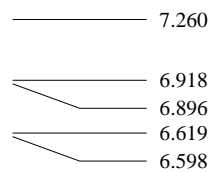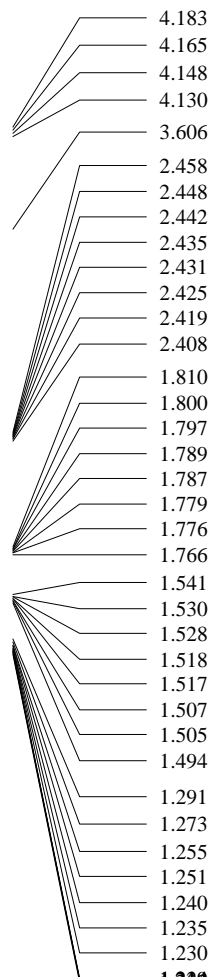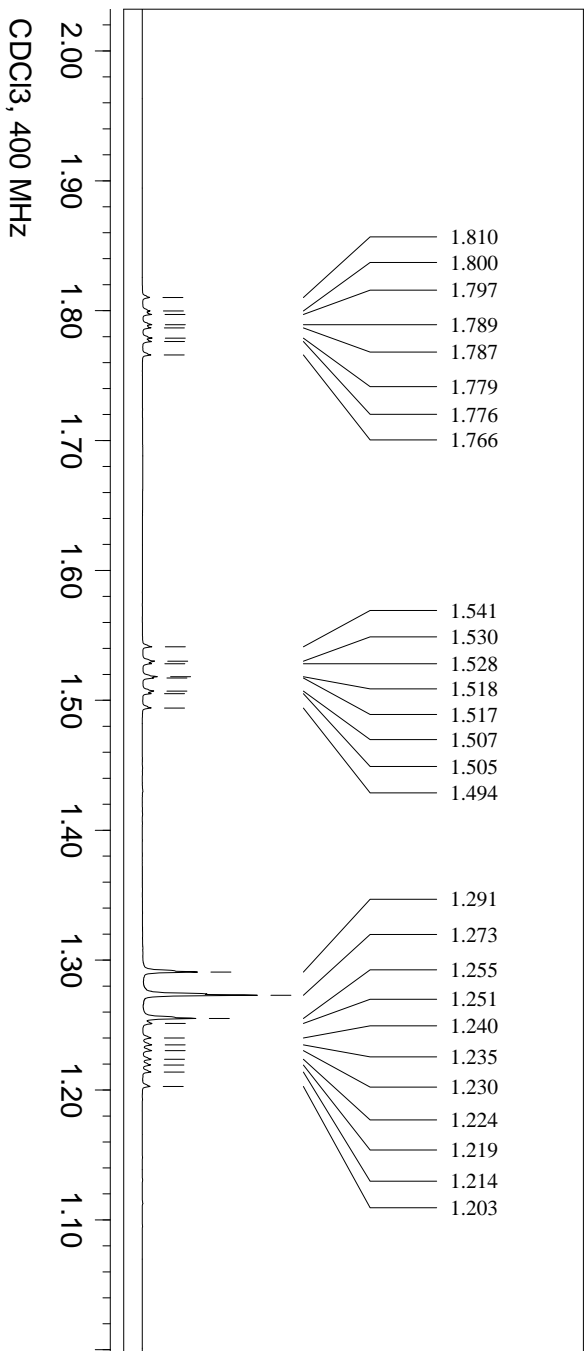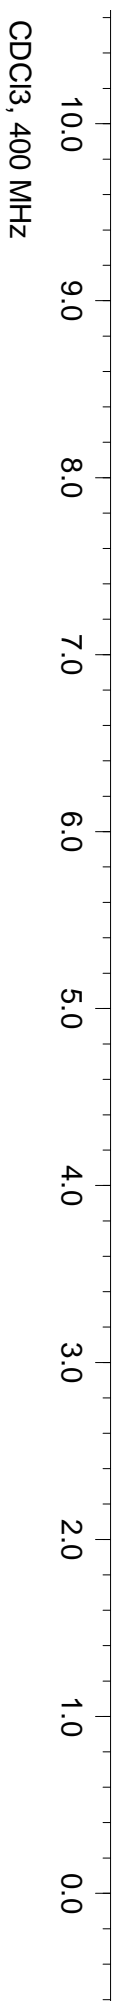

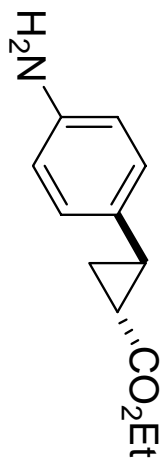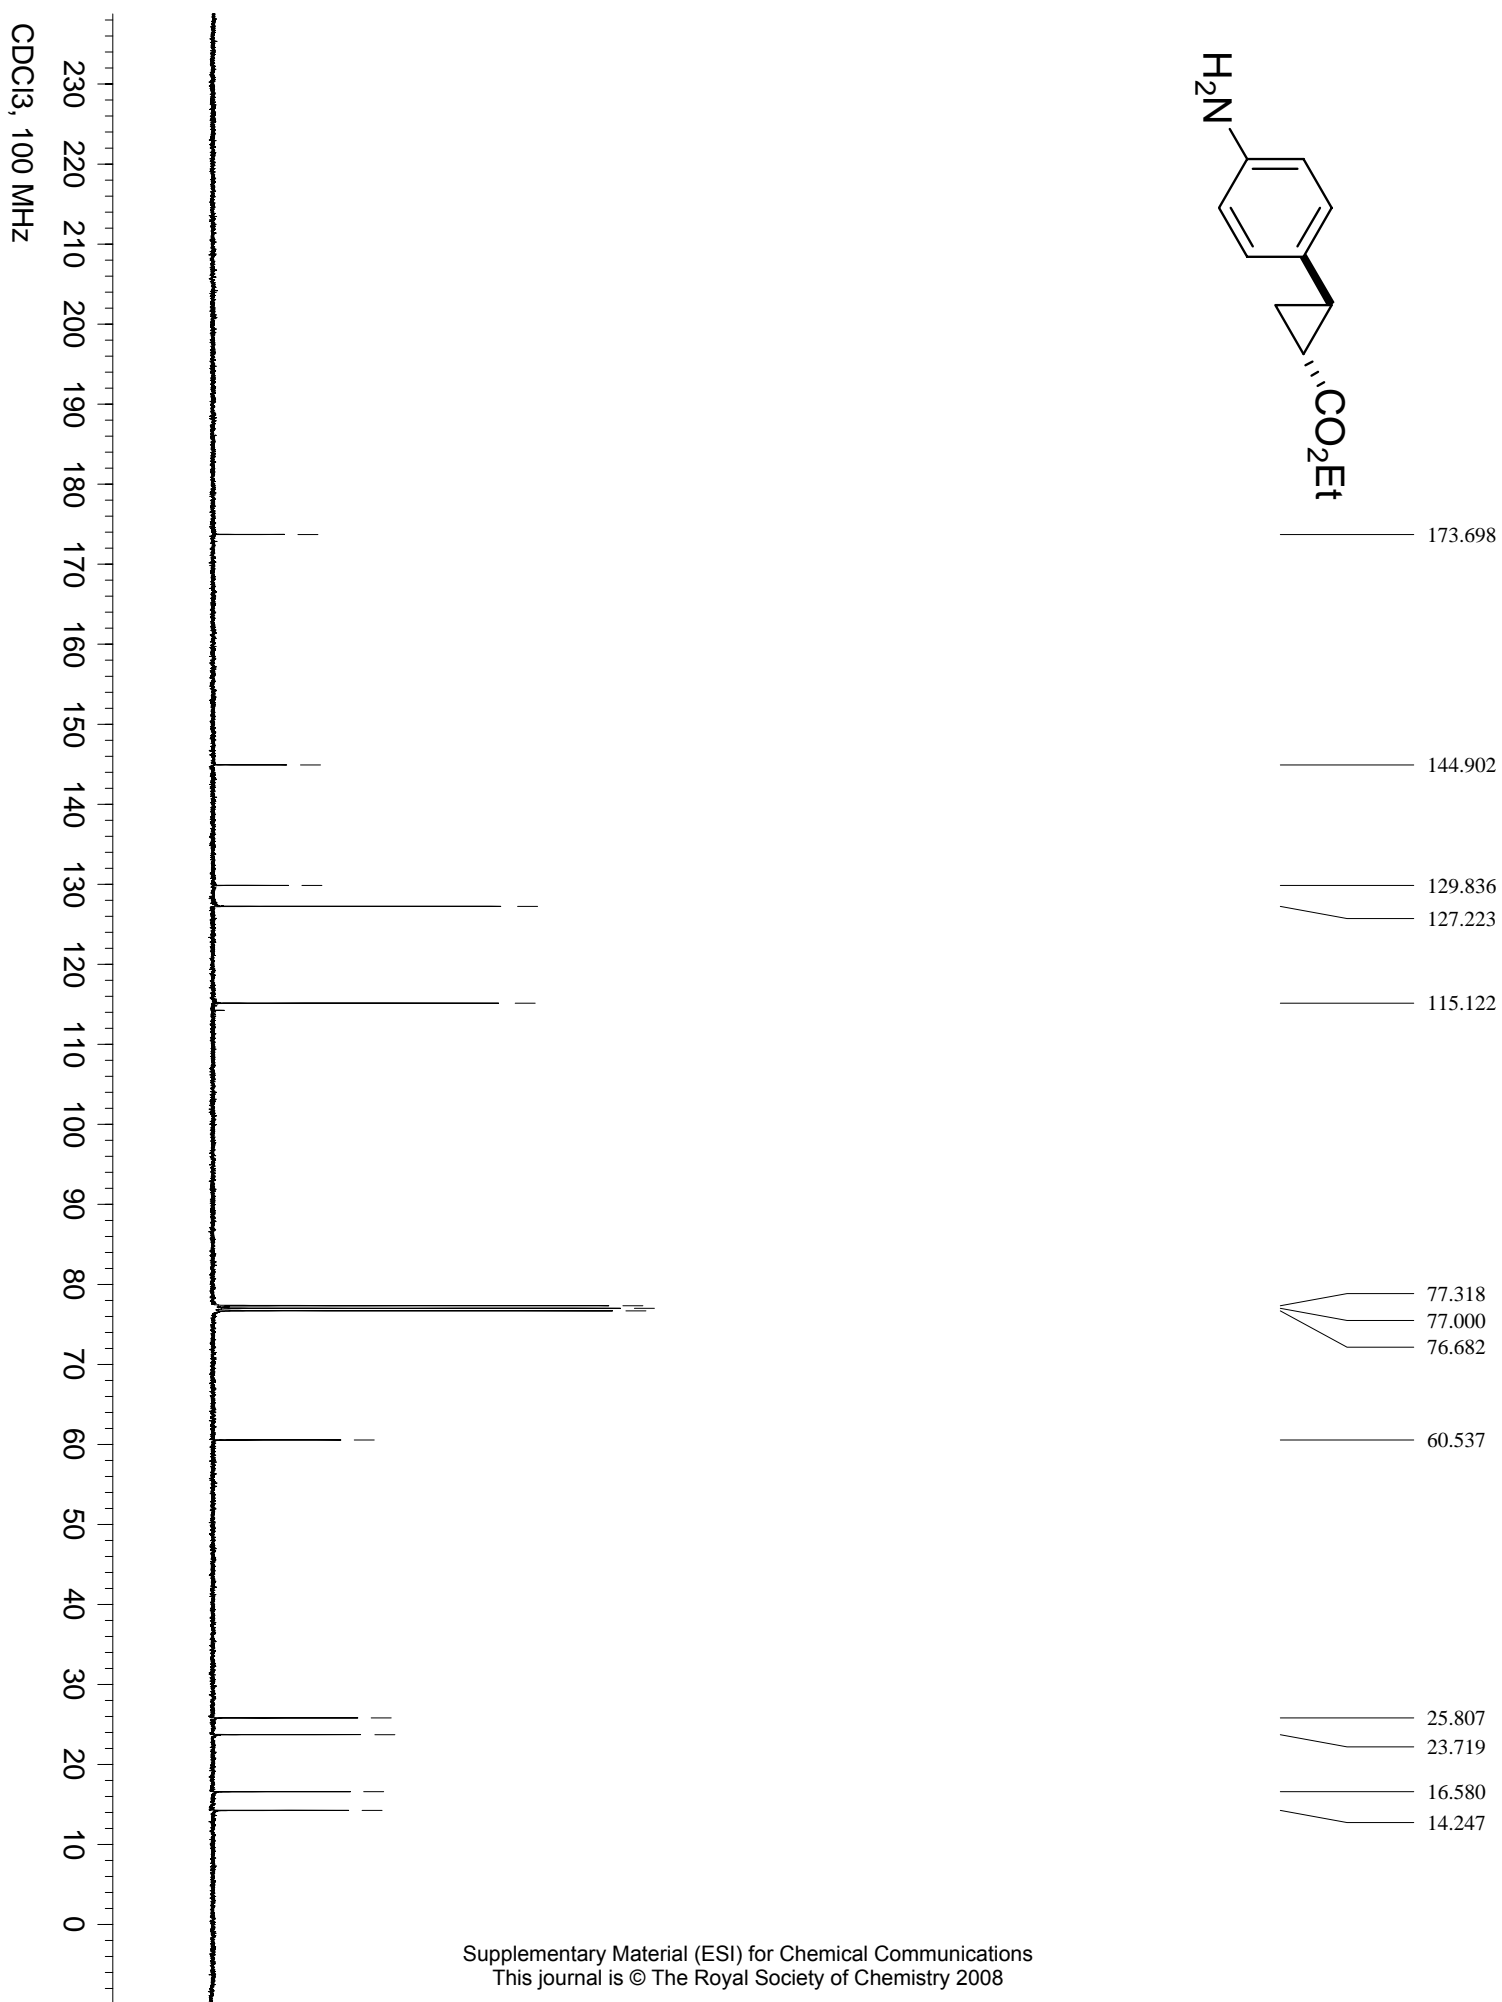

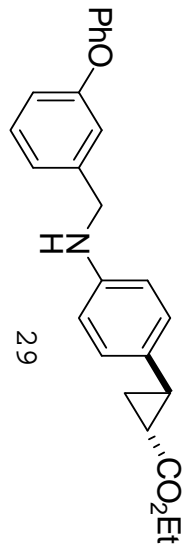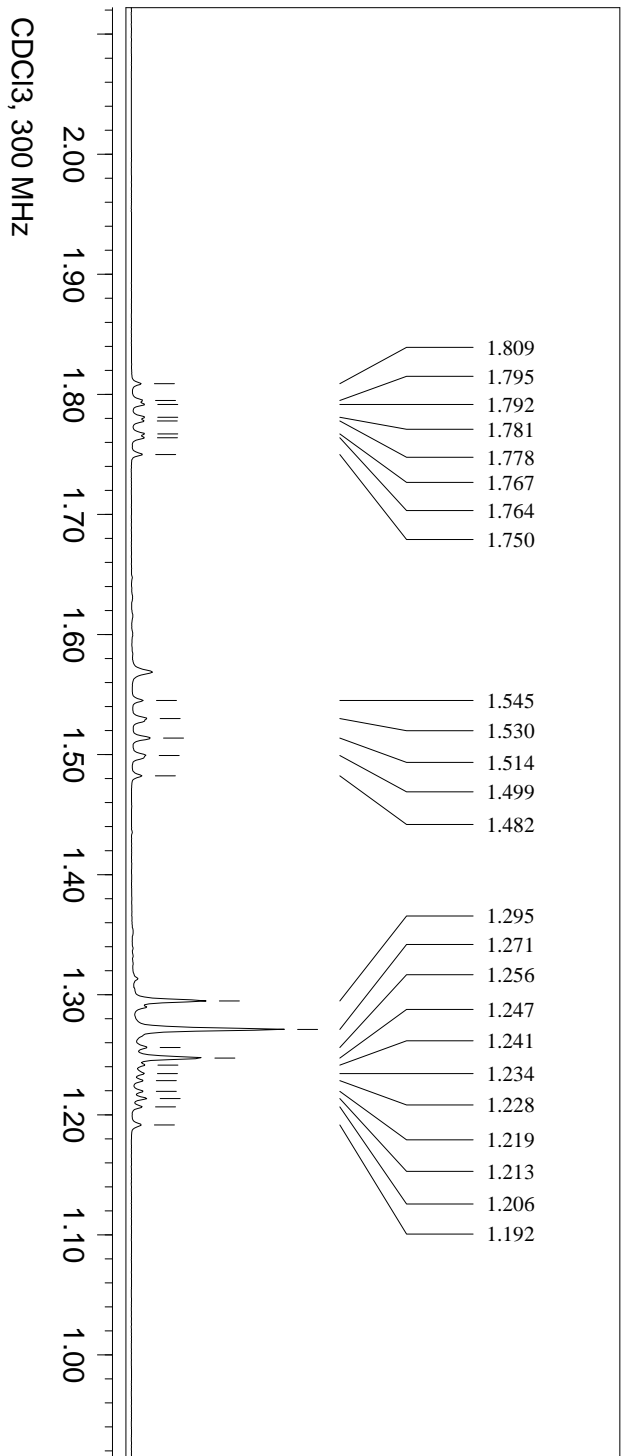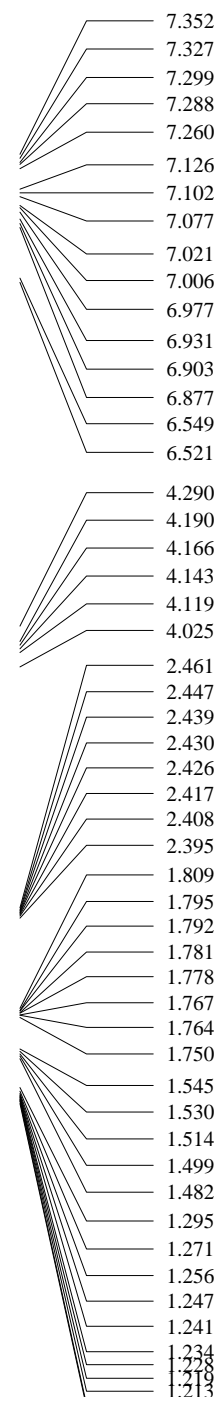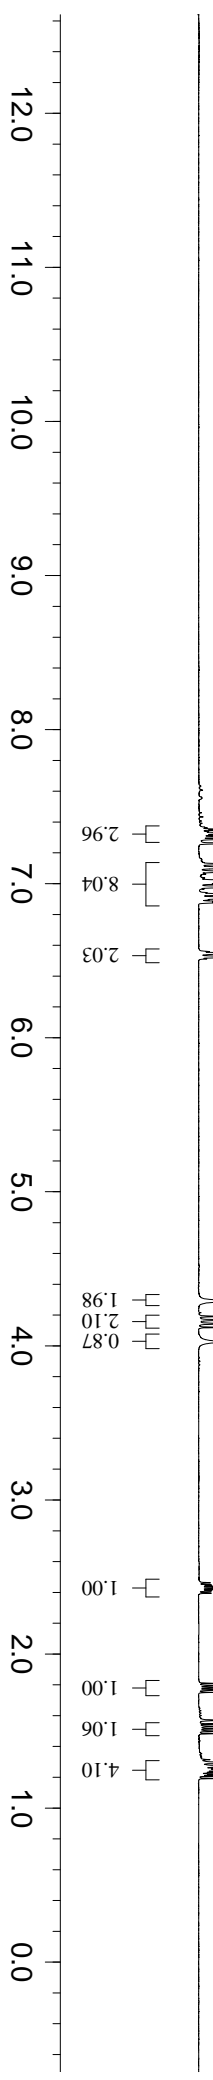



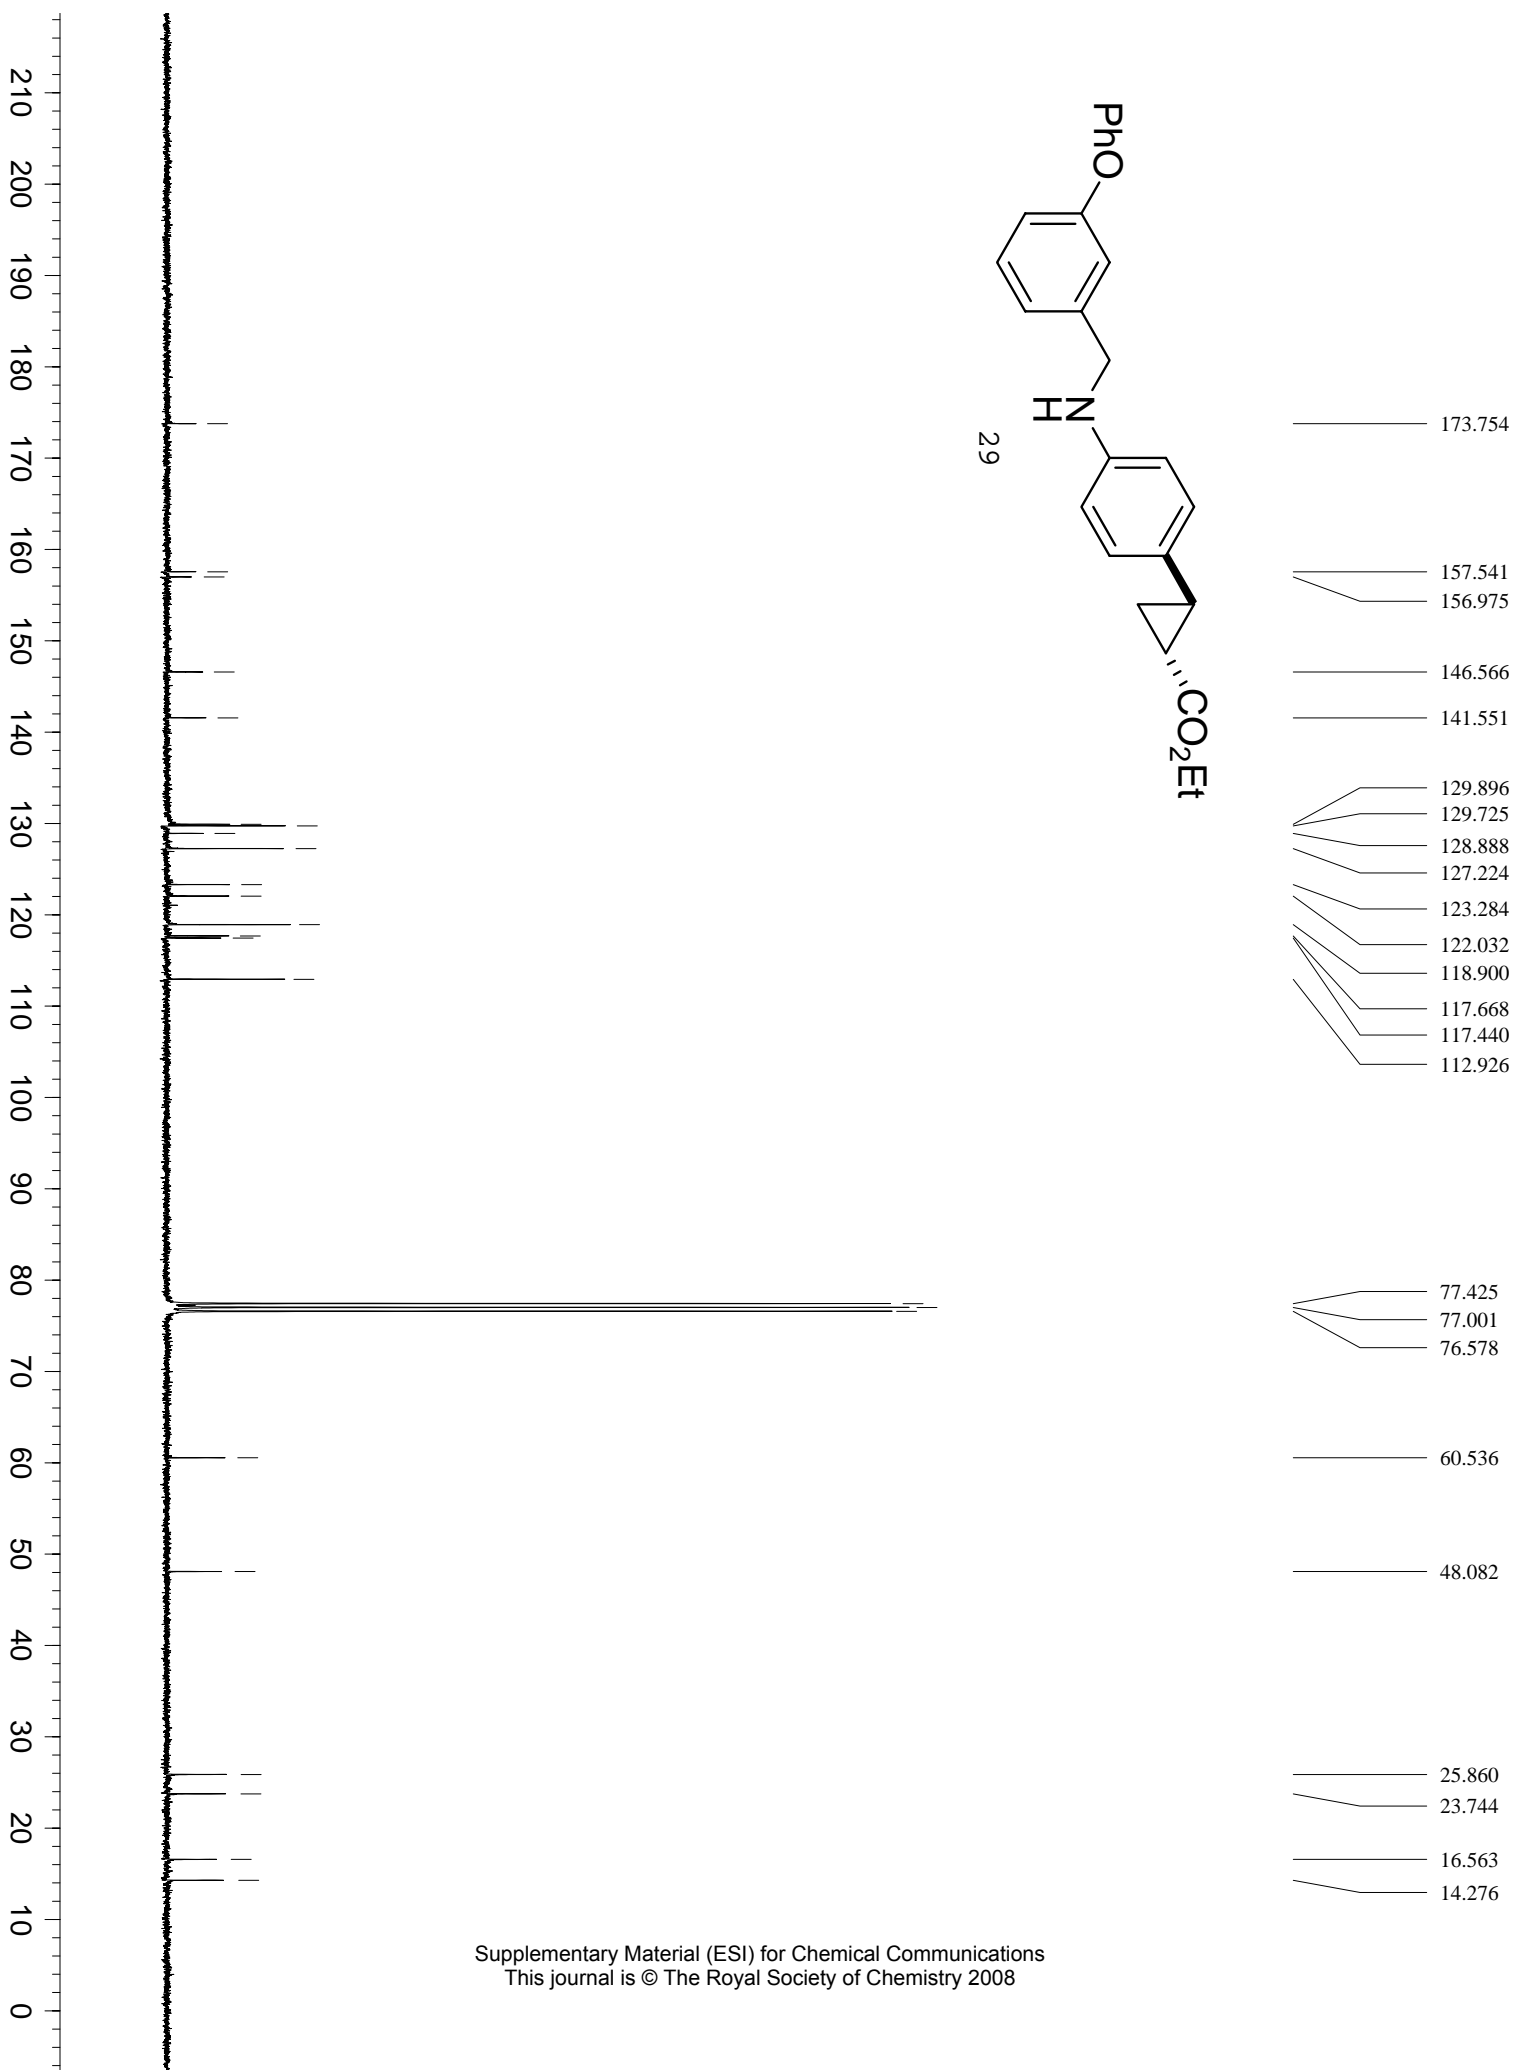

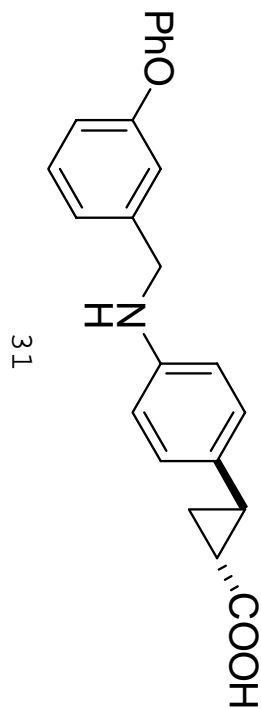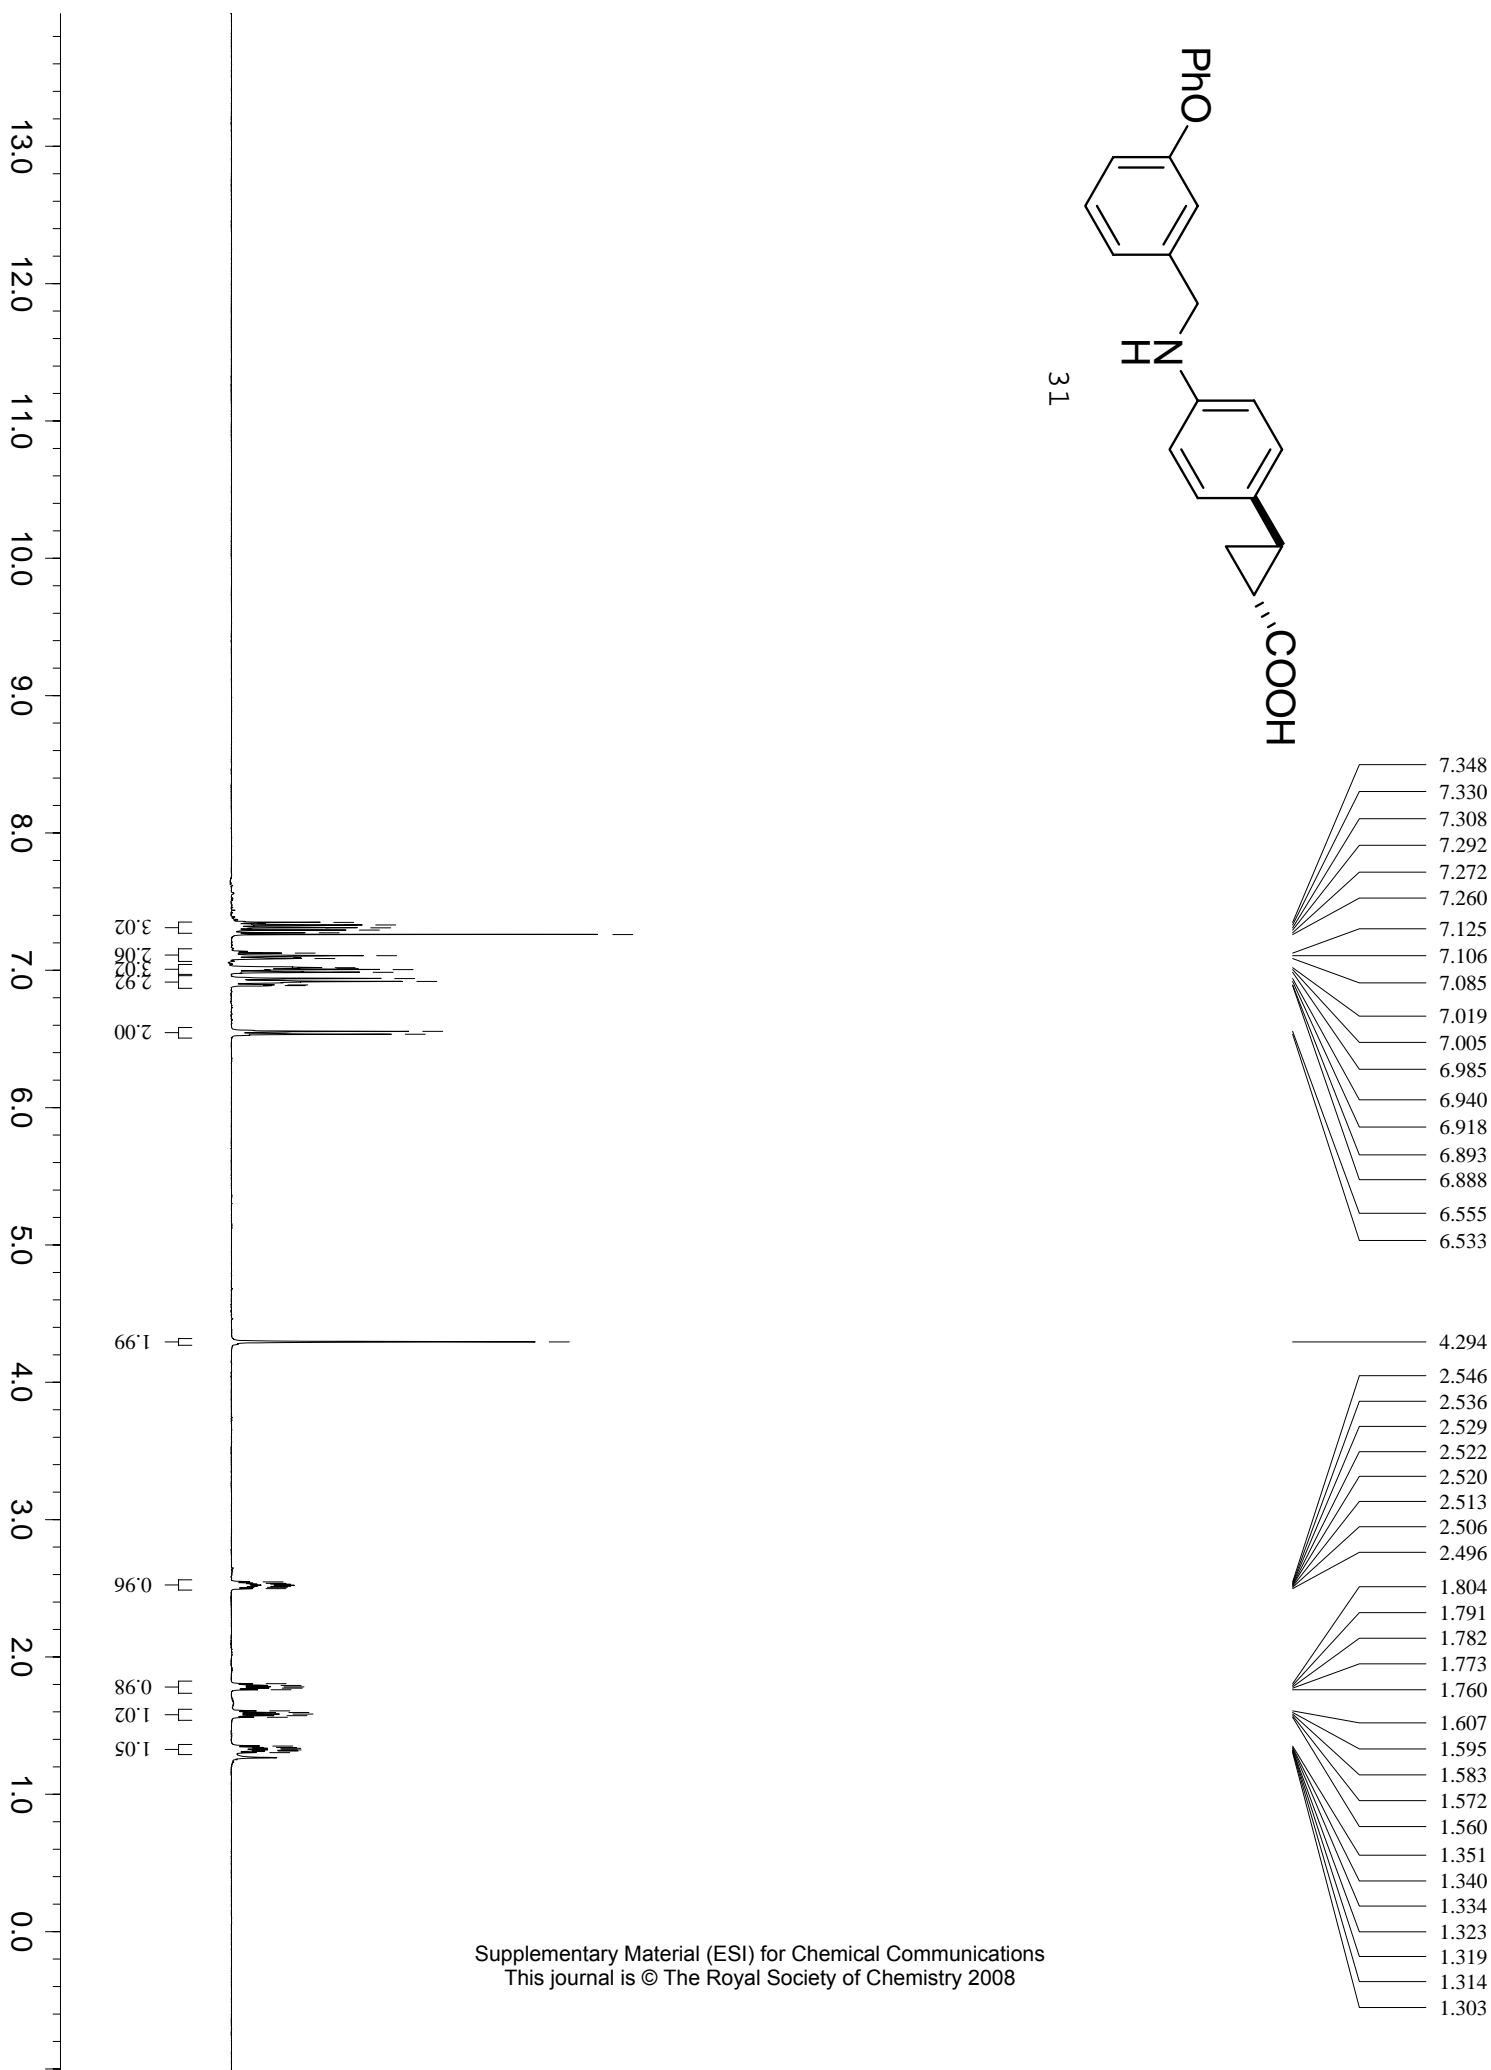

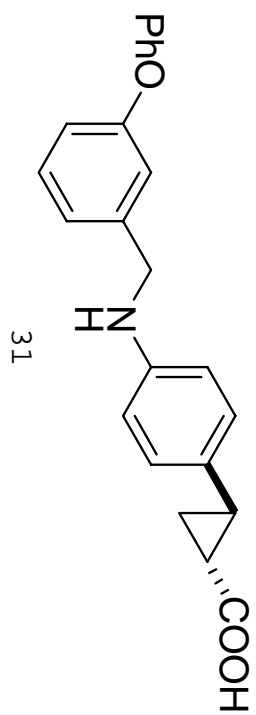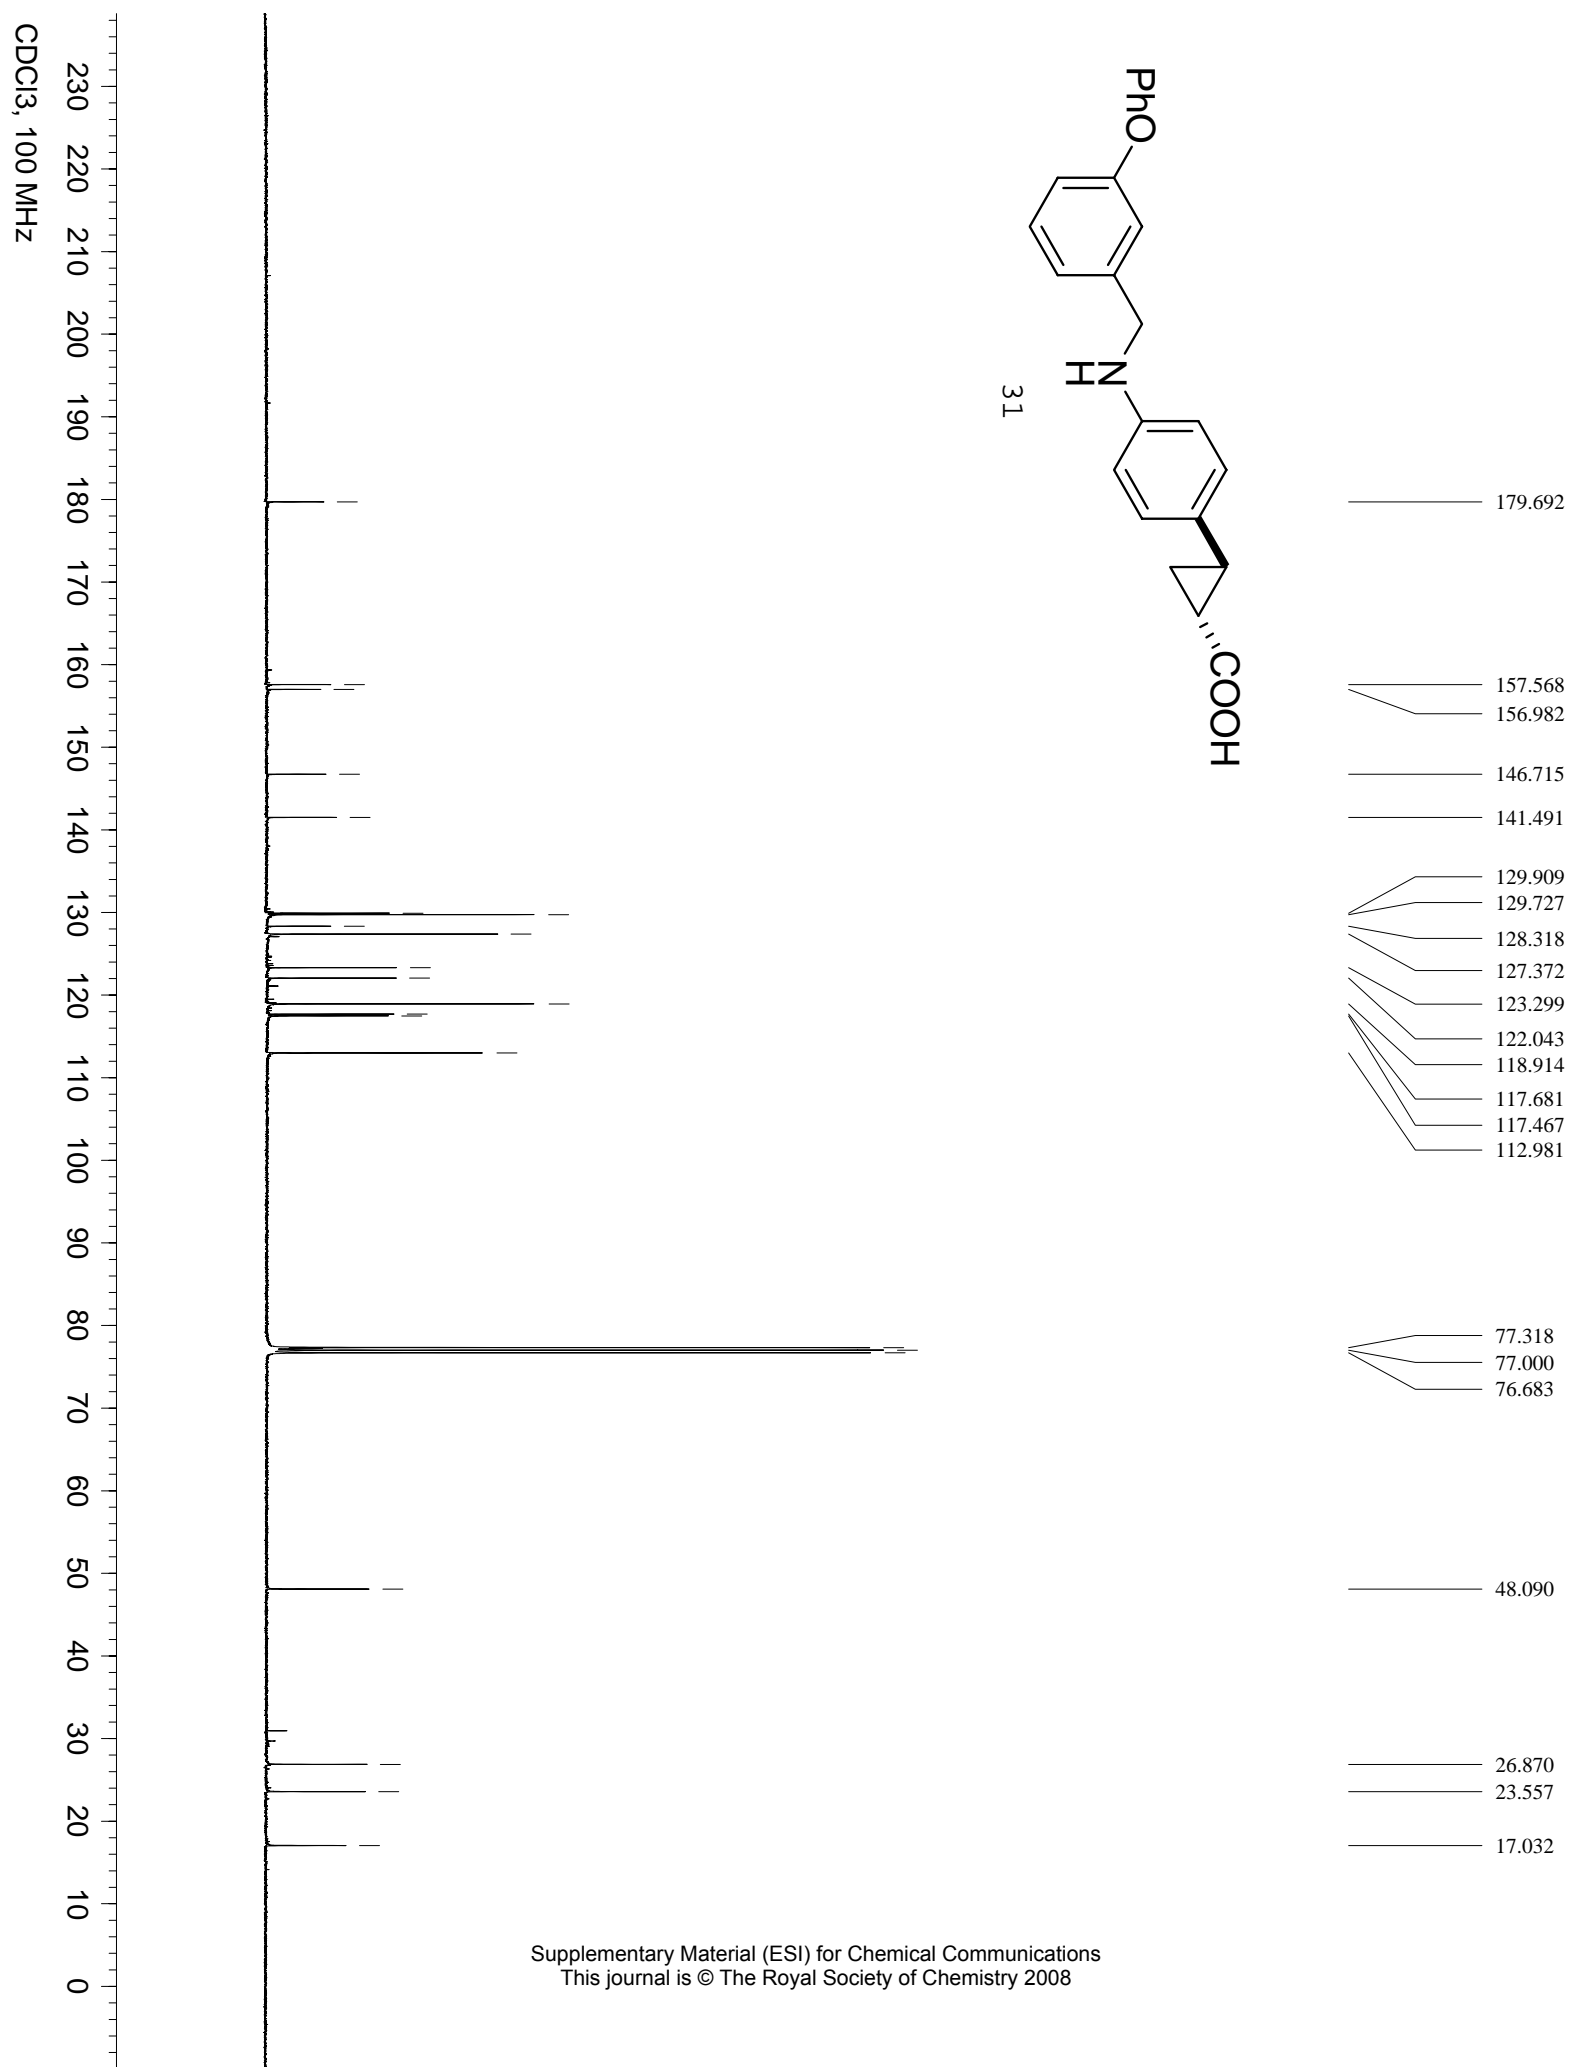

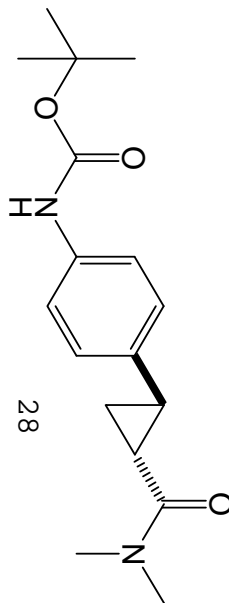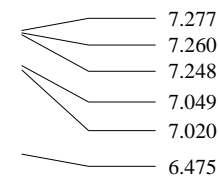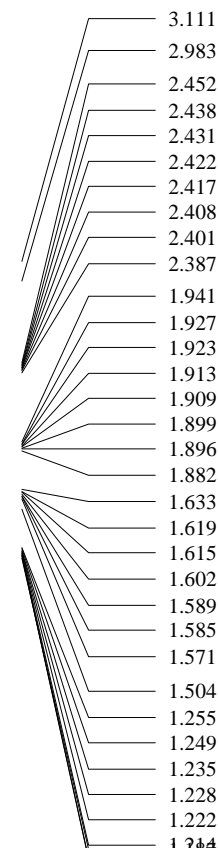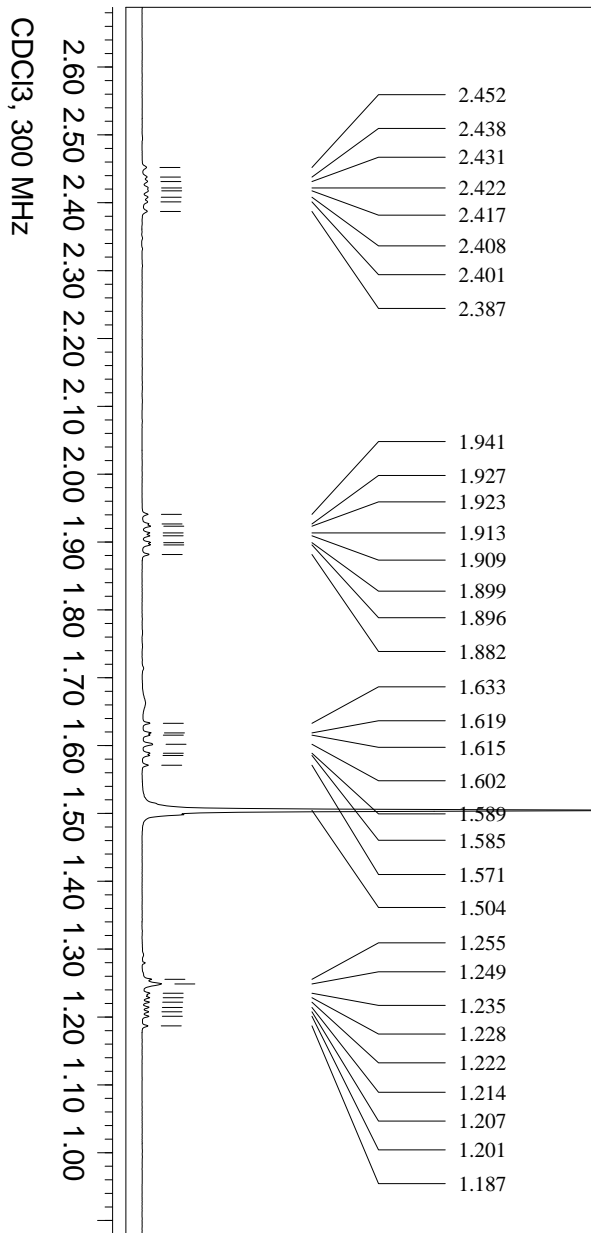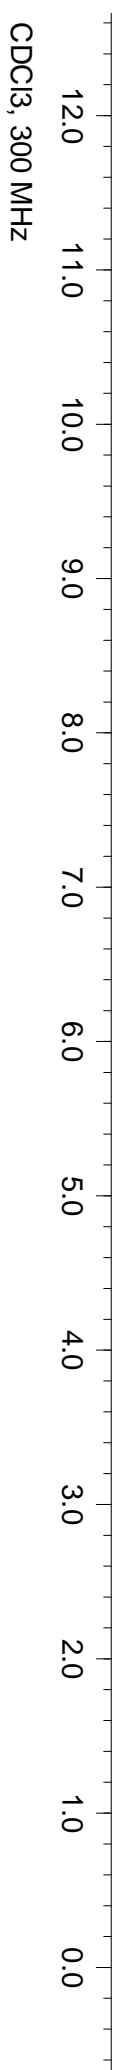

CDCI3, 100 MHz

210 200 190 180 170 160 150 140 130 120 110 100 90 80 70 60 50 40 30 20 10 0

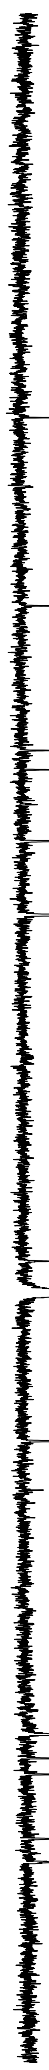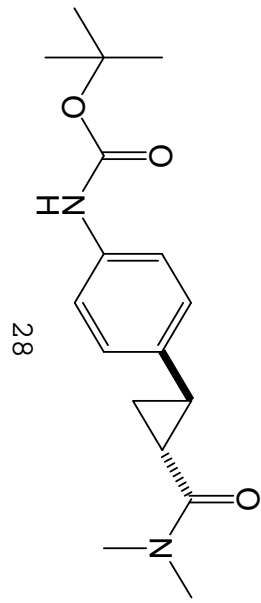

- 173.442
- 152.699
- 136.773
- 134.637
- 126.790
- 118.634
- 80.481
- 77.318
- 77.000
- 76.682
- 60.654
- 28.320
- 25.701
- 23.932
- 16.810
- 14.251

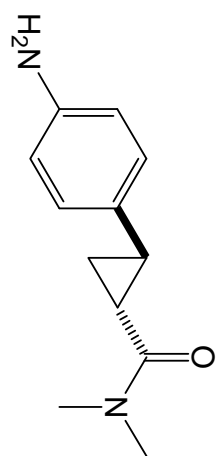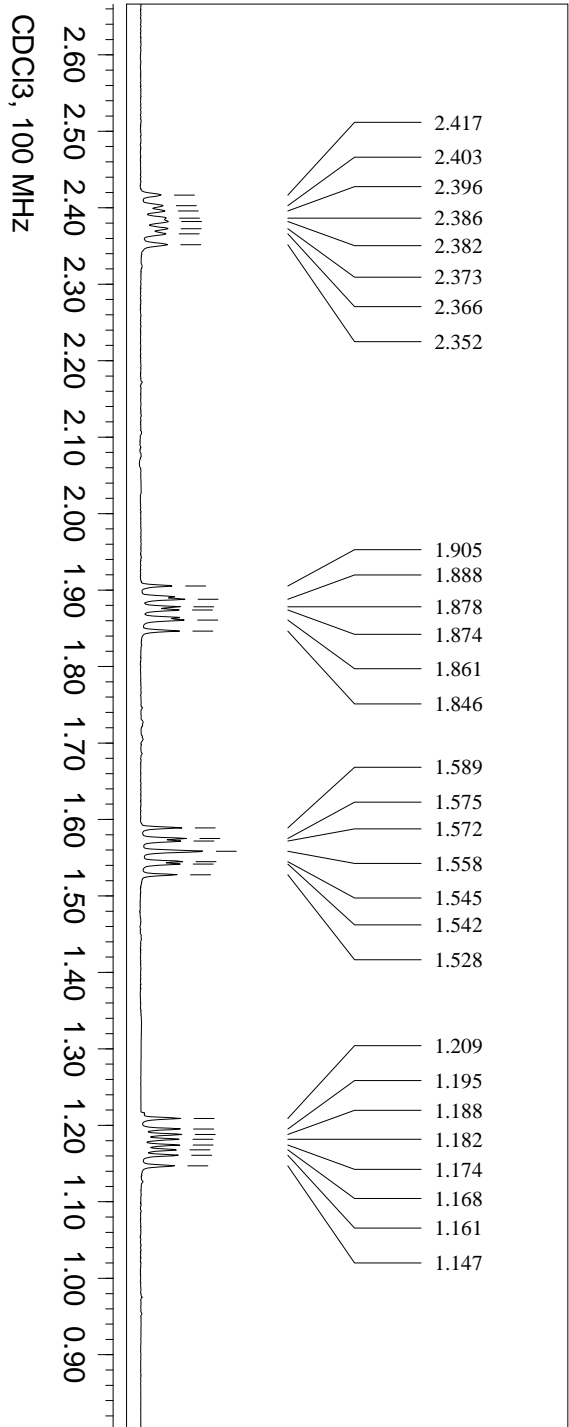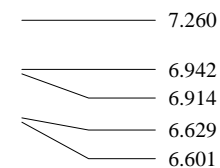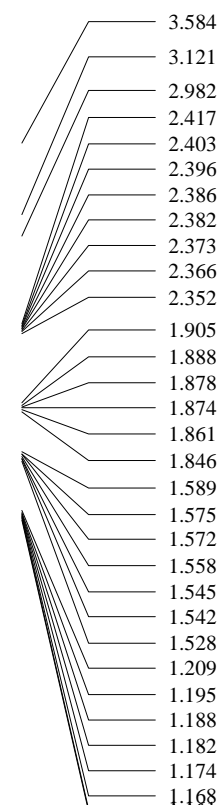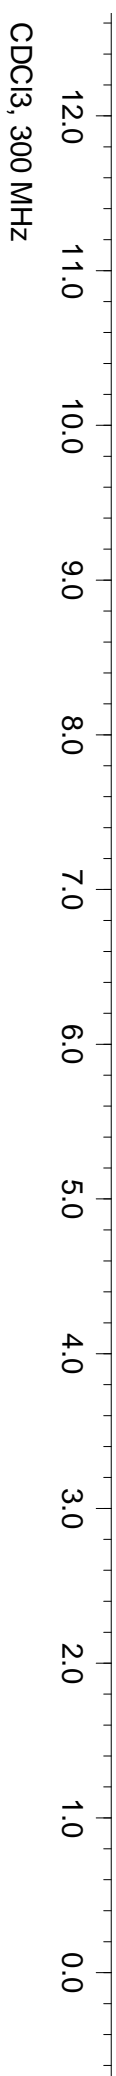

CDCI3, 75 MHz

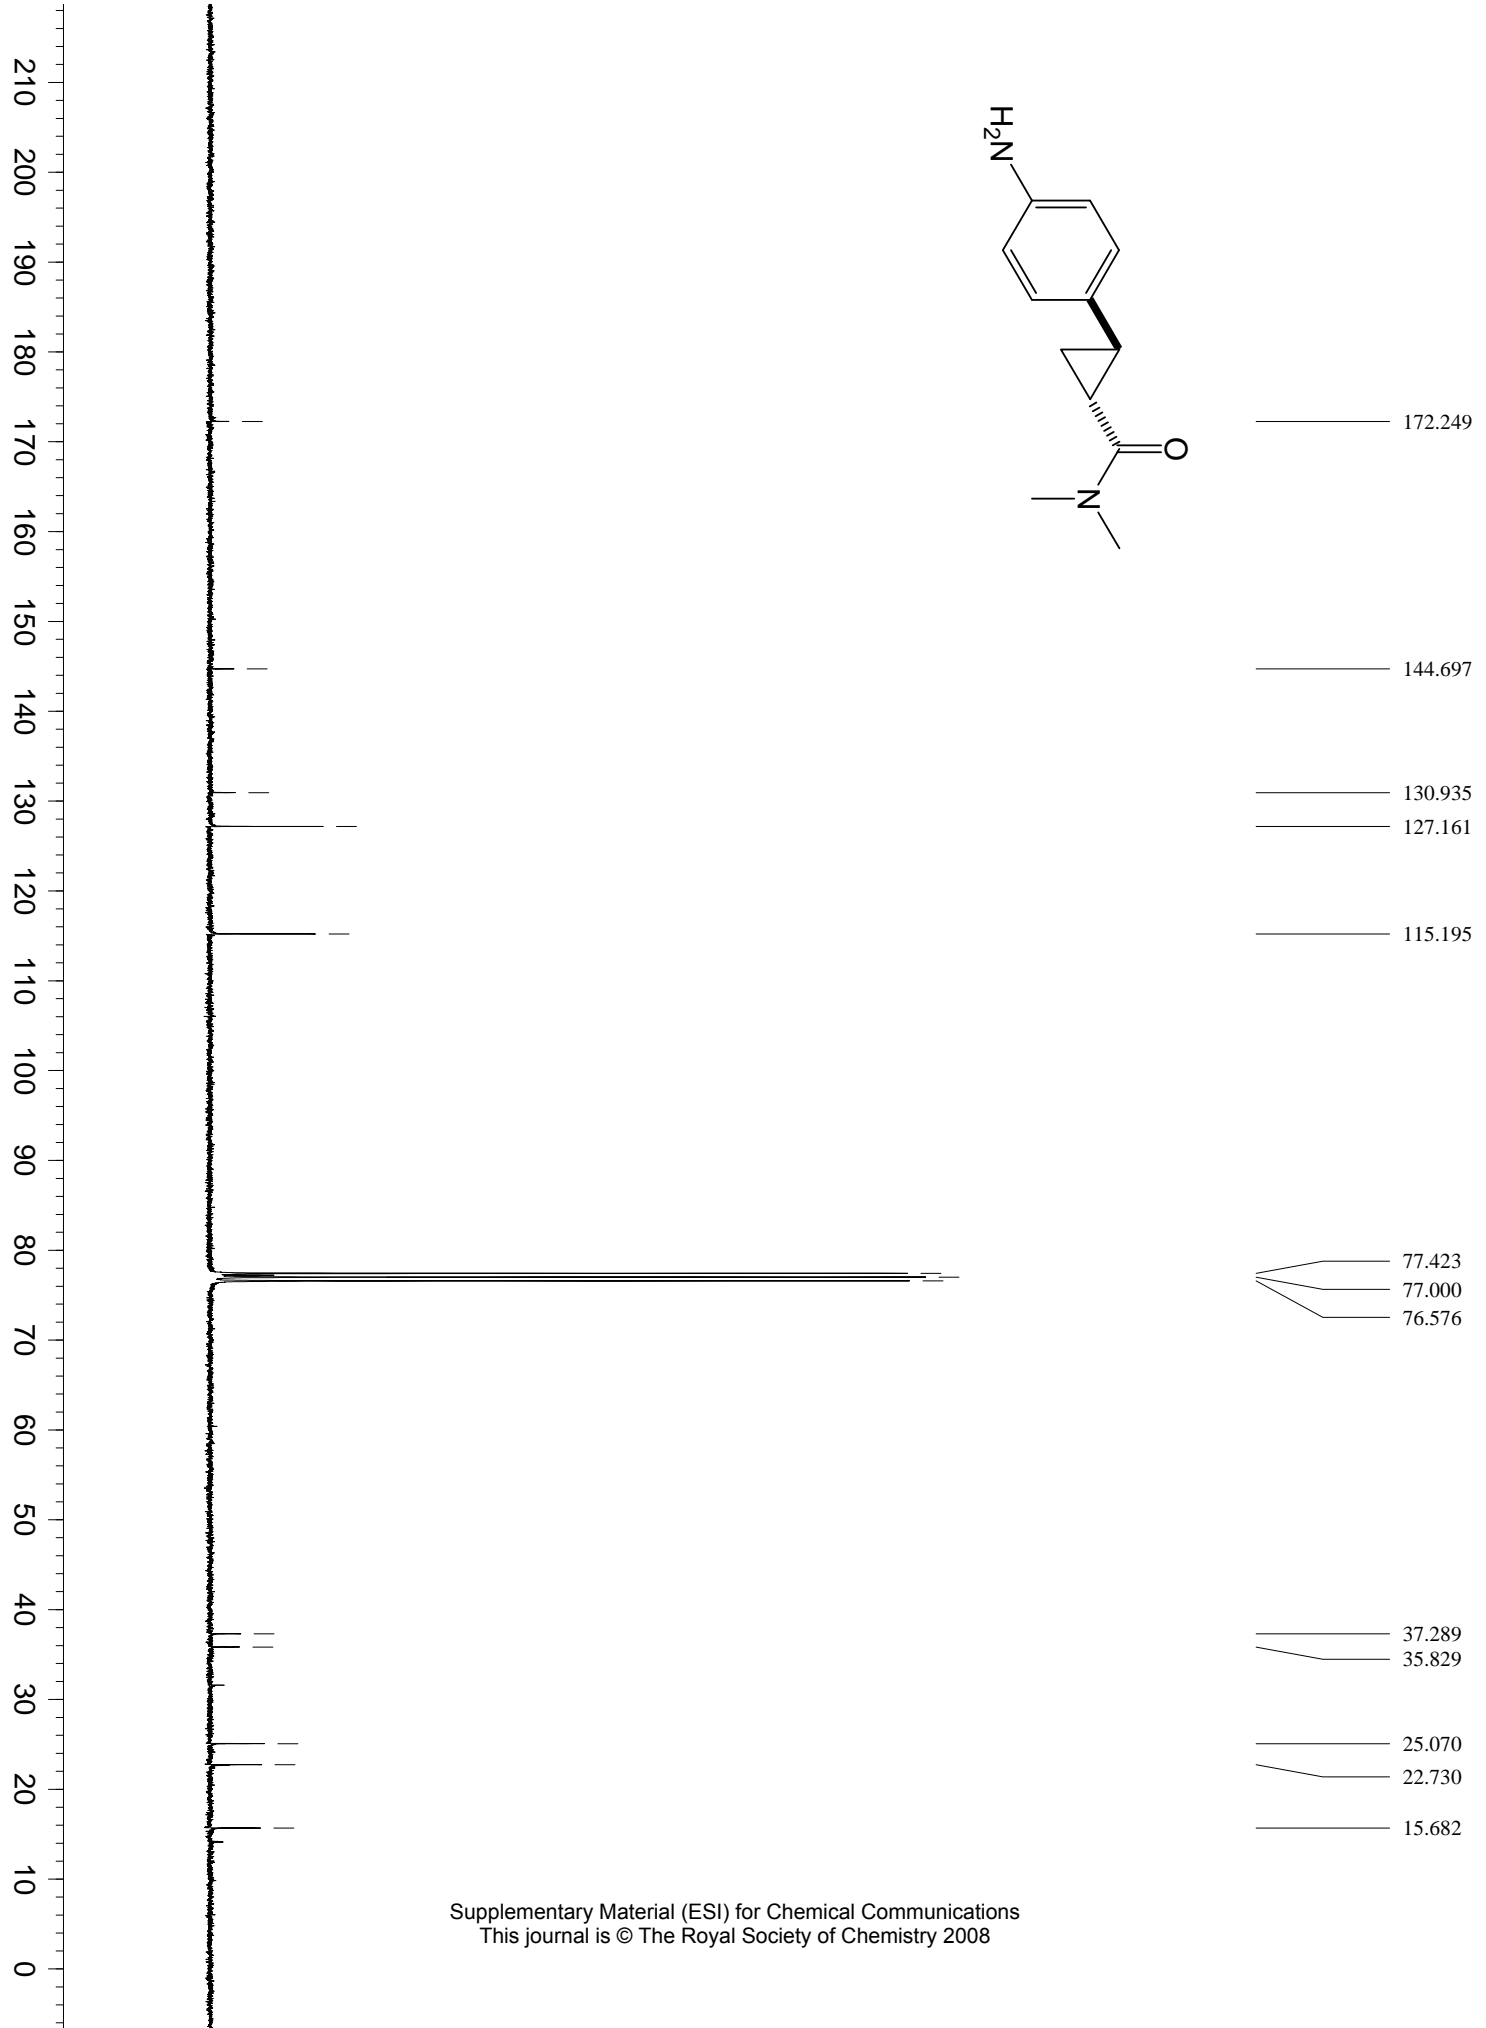

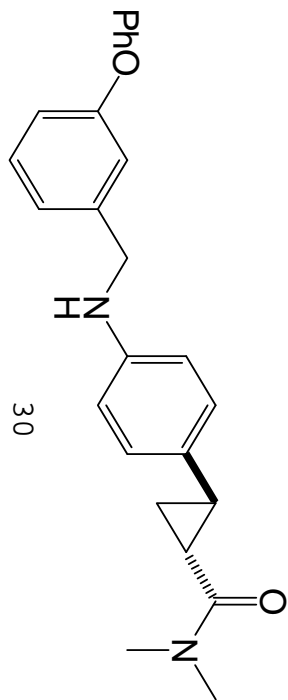

30

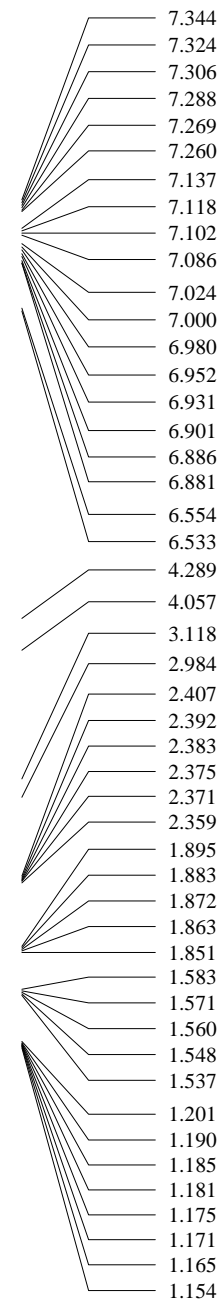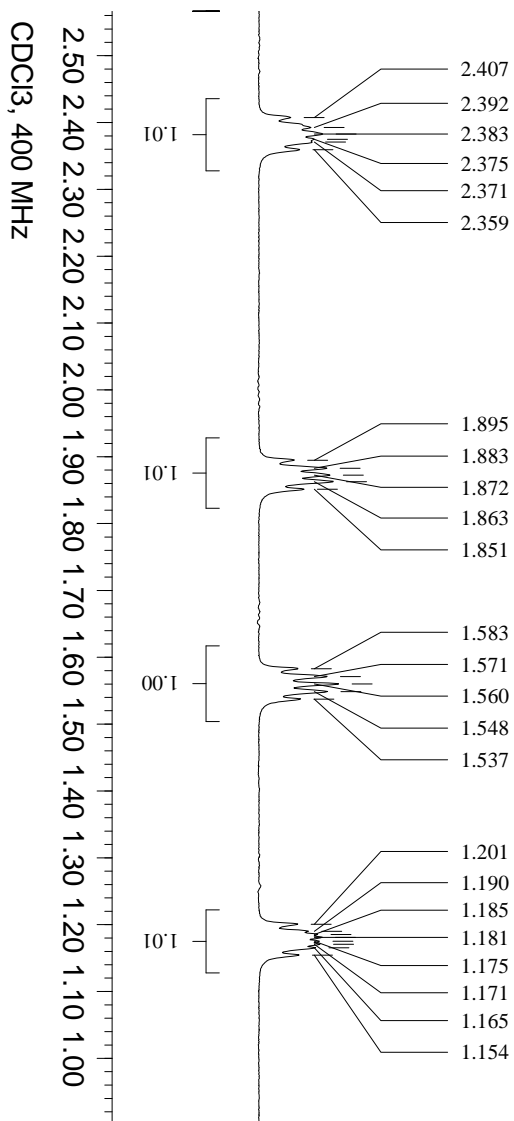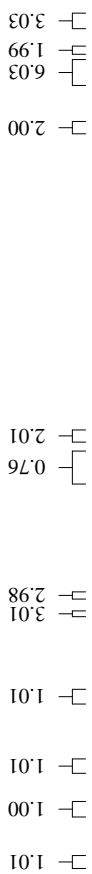



CDCI3, 100 MHz

230 220 210 200 190 180 170 160 150 140 130 120 110 100 90 80 70 60 50 40 30 20 10 0

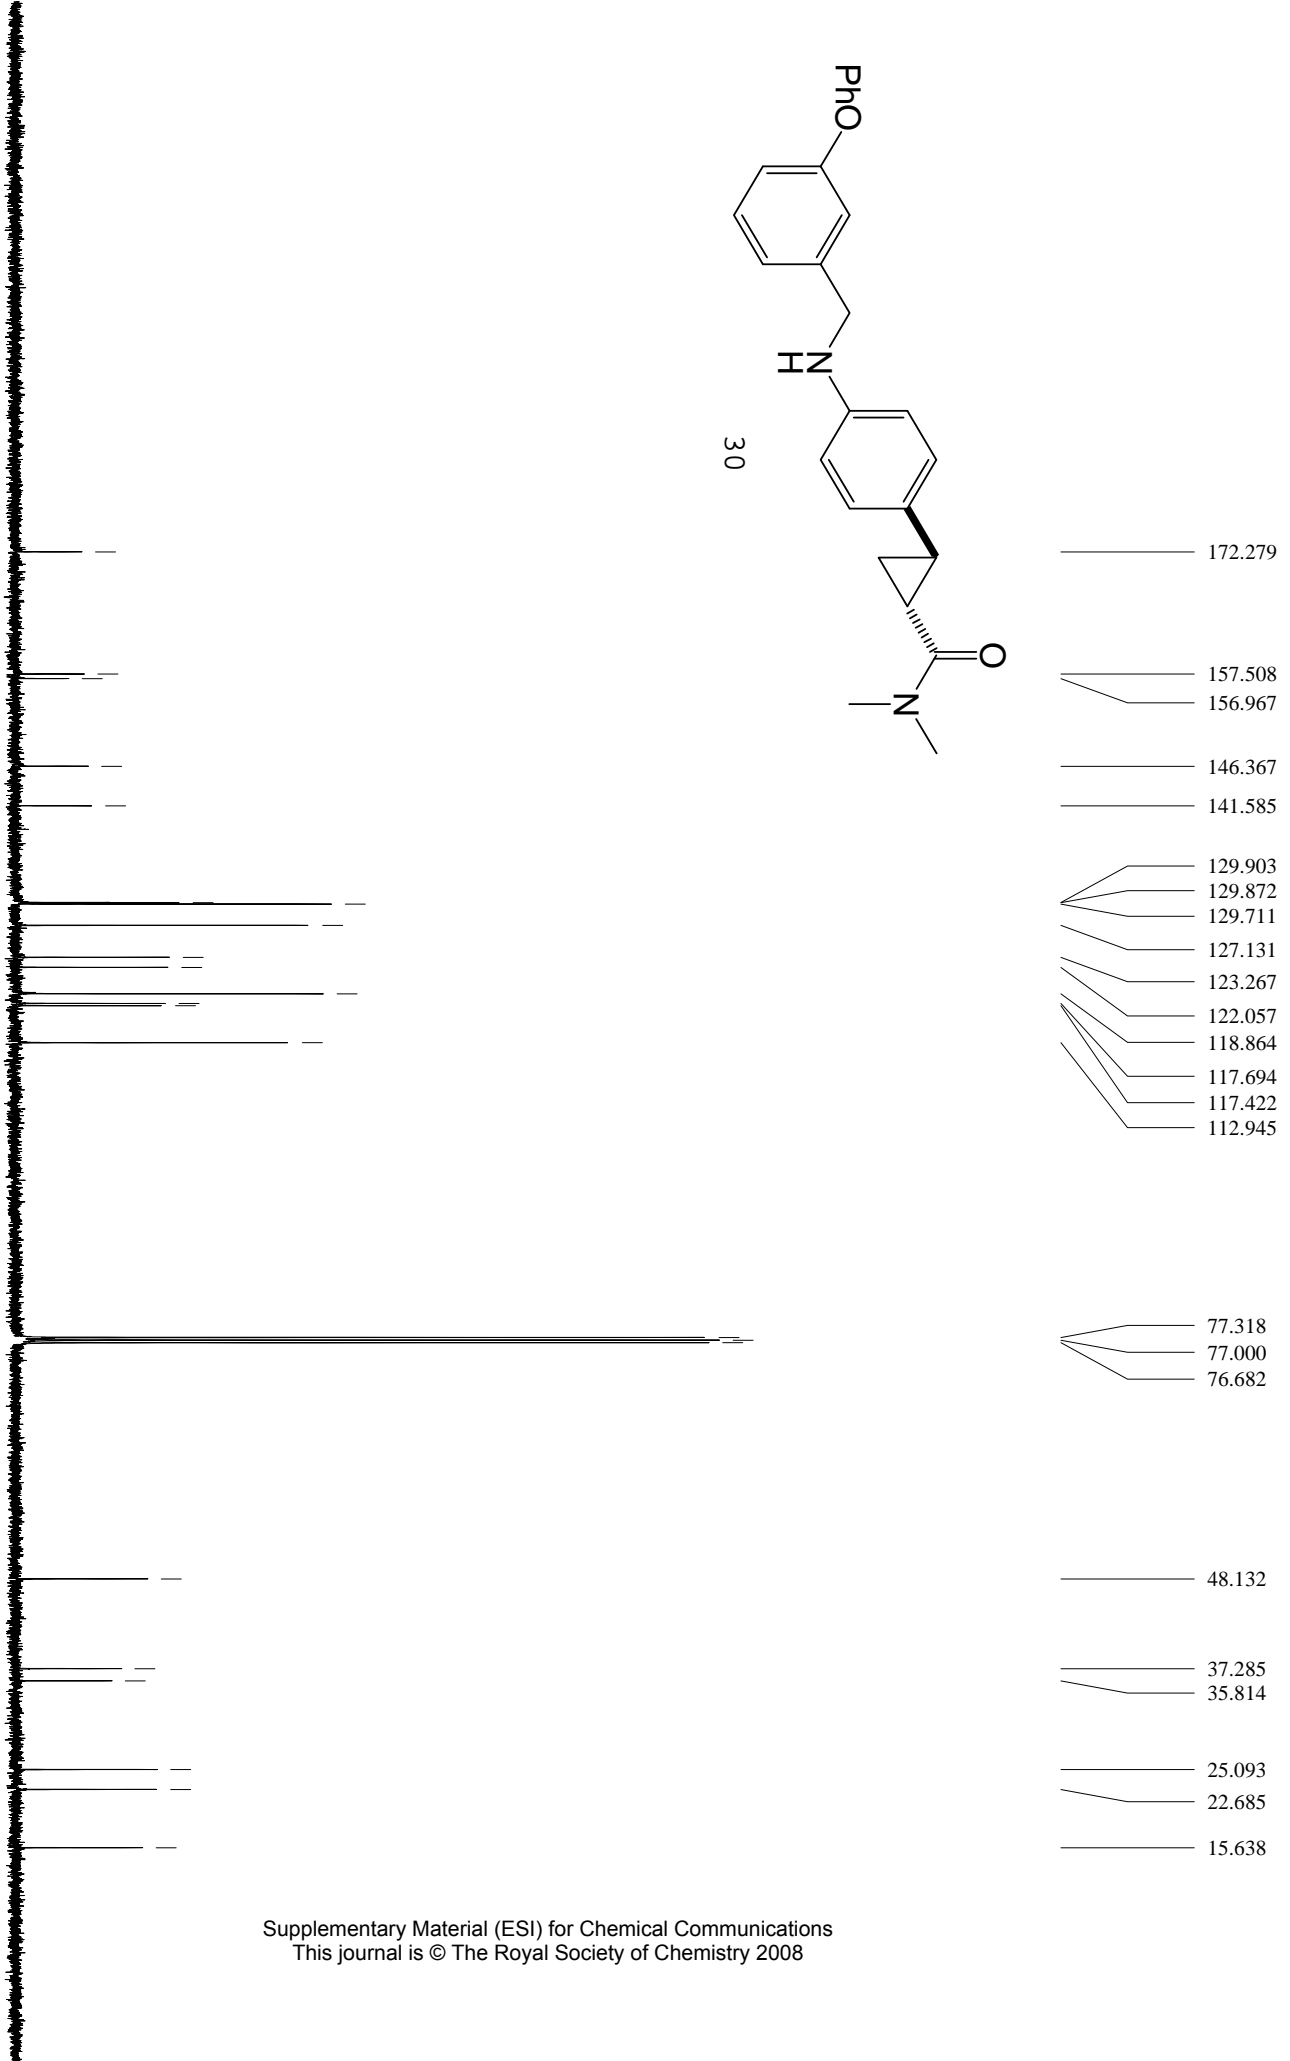

Supplement: b810708d_21-30.pdf [file b810708d_21-30.pdf]
